1  
2  
3  
4  
5  
6  
7  
8  
9  
10  
11  
12  
13  
14  
15  
16  
17  
18  
19  
20  
21  
22  
23  
24  
25  
26  
27  
28  
29  
30  
31  
32

**Mutational resilience of antiviral restriction favors primate TRIM5α in host-virus  
evolutionary arms races**

Jeannette L. Tenthorey<sup>1,†</sup>, Candice Young<sup>1</sup>, Afeez Sodeinde<sup>1</sup>,  
Michael Emerman<sup>1,2,\*</sup>, and Harmit S. Malik<sup>1,3,\*</sup>

<sup>1</sup>Divisions of Basic Sciences and <sup>2</sup>Human Biology and <sup>3</sup>Howard Hughes Medical Institute,  
Fred Hutchinson Cancer Research Center, Seattle, WA 98109

Running head: *TRIM5α adaptation: low cost, high gain*

<sup>†</sup>To whom correspondence should be addressed: [jtenthor@fredhutch.org](mailto:jtenthor@fredhutch.org)

\*Authors contributed equally

## 1 **ABSTRACT**

2 Host antiviral proteins engage in evolutionary arms races with viruses, in which both sides  
3 rapidly evolve at interaction interfaces to gain or evade immune defense. For example, primate  
4 TRIM5 $\alpha$  uses its rapidly evolving “v1” loop to bind retroviral capsids, and single mutations in this  
5 loop can dramatically improve retroviral restriction. However, it is unknown whether such gains  
6 of viral restriction are rare, or if they incur loss of pre-existing function against other viruses.  
7 Using deep mutational scanning, we comprehensively measured how single mutations in the  
8 TRIM5 $\alpha$  v1 loop affect restriction of divergent retroviruses. Unexpectedly, we found that the  
9 majority of mutations increase antiviral function. Moreover, most random mutations do not  
10 disrupt potent viral restriction, even when it is newly acquired via single adaptive substitutions.  
11 Our results indicate that TRIM5 $\alpha$ 's adaptive landscape is remarkably broad and mutationally  
12 resilient, maximizing its chances of success in evolutionary arms races with retroviruses.

13

## 14 **INTRODUCTION**

15 Mammalian genomes combat the persistent threat of viruses by encoding a battery of cell-  
16 intrinsic antiviral proteins, termed restriction factors, that recognize and inhibit viral replication  
17 within host cells. The potency of restriction factors places selective pressure on viruses to evade  
18 recognition in order to complete replication (Duggal & Emerman, 2012). In turn, viral escape  
19 spurs adaptation of restriction factors, by selecting for variants that re-establish viral recognition  
20 and thereby restriction (McCarthy, Kirmaier, Autissier, & Johnson, 2015). Mutual antagonism  
21 between viruses and their hosts thus drives cycles of recurrent adaptation, in prey-predator-like  
22 genetic arms races (Van Valen, 1973). These arms races result in the rapid evolution of  
23 restriction factors, which accumulate amino acid mutations at their virus-binding interface at a  
24 higher than expected rate (M. D. Daugherty & Malik, 2012).

25 Numerous restriction factors, including TRIM5 $\alpha$  (Sawyer, Wu, Emerman, & Malik, 2005),  
26 APOBEC3G (Sawyer, Emerman, & Malik, 2004), and MxA (Mitchell et al., 2012), evolve rapidly  
27 as a result of arms races with target viruses. The resulting divergence between restriction factor  
28 orthologs can result in cross-species barriers to viral infection (Compton & Emerman, 2013;  
29 Kirmaier et al., 2010). Such barriers led to the initial identification of TRIM5 $\alpha$ , during a screen for  
30 proteins that prevented HIV-1 (human immunodeficiency virus) from efficiently replicating in  
31 rhesus macaque cells (Stremlau et al., 2004). Rhesus TRIM5 $\alpha$  could potentially restrict HIV-1,  
32 whereas the virus almost completely escapes TRIM5 $\alpha$ -mediated inhibition in its human host.  
33 Subsequent studies revealed that restriction of SIVs (simian immunodeficiency viruses) also

1 varies across TRIM5 $\alpha$  orthologs and that SIVs likely drove the rapid evolution of TRIM5 $\alpha$  in Old  
2 World monkeys (McCarthy et al., 2015; F. Wu et al., 2013).

3 TRIM5 $\alpha$  disrupts retroviral replication early in infection by binding to the capsid core of  
4 retroviruses entering the cell (Y.-L. Li et al., 2016; Maillard, Reynard, Serhan, Turelli, & Trono,  
5 2007; Owens, Yang, Gottlinger, & Sodroski, 2003). Its binding causes the premature uncoating  
6 of the viral core (Stremlau et al., 2006), preventing delivery of the viral genome to the nucleus  
7 for integration. TRIM5 $\alpha$  binds to the capsid via the unstructured v1 loop within its B30.2 domain  
8 (Biris et al., 2012; Sebastian & Luban, 2005). Experiments swapping the v1 loop between  
9 TRIM5 $\alpha$  orthologs indicate that it is critical for recognition of capsid from many retroviruses  
10 (Ohkura, Yap, Sheldon, & Stoye, 2006; Perron, Stremlau, & Sodroski, 2006; Sawyer et al.,  
11 2005). In Old World monkeys and hominoids, rapid evolution of TRIM5 $\alpha$  is concentrated within  
12 this v1 loop (Sawyer et al., 2005) (Figure 1A). Single amino acid mutations at these rapidly  
13 evolving sites can cause dramatic gains of restriction against HIV-1 and other retroviruses (Y.  
14 Li, Li, Stremlau, Lee, & Sodroski, 2006; Maillard et al., 2007; Yap, Nisole, & Stoye, 2005).  
15 However, it remains unclear whether such adaptive mutations are rare among all single  
16 mutational steps that might be randomly sampled during TRIM5 $\alpha$ 's natural evolution.

17 The functional consequence of all single mutations from a given protein sequence can  
18 be visualized as an evolutionary landscape (Smith, 1970), in which mutations are either  
19 beneficial (fitness peak), detrimental (fitness valley), or neutral. The topology of this evolutionary  
20 landscape, in terms of numbers of peaks and valleys and their connections, represents the  
21 adaptive potential of restriction factors in their evolutionary arms race with viruses. Previous  
22 studies that have empirically mapped evolutionary landscapes of conserved enzymes and  
23 transcription factors revealed that ligand-binding residues are highly intolerant to substitutions  
24 (Fowler et al., 2010; Guo, Choe, & Loeb, 2004; McLaughlin, Poelwijk, Raman, Gosal, &  
25 Ranganathan, 2012; Suckow et al., 1996). Moreover, mutations that allowed proteins to gain  
26 novel ligand specificity, even for closely related ligands, were rare among all possible  
27 substitutions (McLaughlin et al., 2012; Starr, Picton, & Thornton, 2017; Stiffler, Hekstra, &  
28 Ranganathan, 2015). In contrast, TRIM5 $\alpha$  and other restriction factors can dramatically change  
29 antiviral potency via single mutations at viral interaction interfaces (M. D. Daugherty & Malik,  
30 2012; Mitchell et al., 2012). However, since the frequency of such gain-of-function mutations is  
31 unknown, it is unclear whether virus-binding surfaces in rapidly evolving antiviral factors are  
32 subject to the same evolutionary constraints as previously mapped for other proteins.

1            Here, we investigated the adaptive landscape of antiviral specificity conferred by the  
2 rapidly evolving, capsid-binding v1 loop of TRIM5 $\alpha$ . To our surprise, we found that, rather than  
3 the evolutionary landscape of TRIM5 $\alpha$  being narrowly constrained among all possible amino  
4 acid substitutions, the majority of random mutations in the v1 loop resulted in gains of antiviral  
5 restriction. We found that the primary v1 loop determinant for TRIM5 $\alpha$ 's restriction of HIV-1 and  
6 other lentiviruses is its net electrostatic charge. Furthermore, both rhesus and human TRIM5 $\alpha$   
7 proteins are highly resilient to mutation, in that they withstand more than half of all possible  
8 single amino acid mutations in the v1 loop without compromising their antiviral restriction  
9 abilities. This unexpectedly permissive landscape allows TRIM5 $\alpha$  to sample a wide variety of  
10 mutations to maximize its chances of success in arms races with retroviruses.

11

## 12 **RESULTS**

### 13 ***A deep mutational scan of the TRIM5 $\alpha$ v1 loop***

14 Despite their rapid evolution, primate TRIM5 $\alpha$  orthologs have sampled relatively limited amino  
15 acid diversity at rapidly evolving positions within the capsid-binding v1 loop (Figure 1A). For  
16 example, although single amino acid changes at residue 332 are responsible for dramatic  
17 differences in antiviral restriction (Y. Li et al., 2006), this residue repeatedly toggles between just  
18 three amino acids. The limited diversity is not due to evolutionary inaccessibility, since most  
19 amino acids that can be sampled with single nucleotide changes are not observed among  
20 primate TRIM5 $\alpha$  orthologs (Figure 1B). There are two alternative explanations for this restricted  
21 diversity. First, it might suggest that adaptive gain-of-function mutations in TRIM5 $\alpha$  are rare,  
22 with TRIM5 $\alpha$ 's evolutionary landscape mainly consisting of fitness valleys with only a few  
23 mutational avenues to reach fitness peaks (Figure 1C). Conversely, the limited diversity might  
24 be a consequence of epistatic interactions with other sites that constrain amino acid sampling,  
25 or even simple chance. Under this scenario, TRIM5 $\alpha$ 's evolutionary landscape may consist of  
26 numerous, wide peaks that tolerate substantial mutational variation (Figure 1D). We sought to  
27 differentiate between these possibilities by experimentally defining the evolutionary landscape of  
28 antiviral restriction, by both human and rhesus TRIM5 $\alpha$ , over all possible single mutational steps  
29 in the v1 loop.



1 TRIM5 $\alpha$ . Rapidly evolving residues are indicated with black arrows and gray boxes. **(B)**  
2 Evolutionarily accessible amino acids were defined as within 1 nucleotide of any codon in this  
3 alignment, and the fraction of accessible variants sampled among aligned sequences was  
4 determined for each position. **(C-D)** Theoretical possibilities for antiviral protein evolutionary  
5 landscapes, with antiviral potency represented in z and color axes as it varies with single point  
6 mutations. Fitness landscapes might be highly constrained **(C)** or permissive **(D)**.  
7

8 We took a deep mutational scanning (DMS) approach (Fowler et al., 2010) to measure  
9 the effect on antiviral restriction of all v1 loop single mutations in a pooled assay. We first  
10 generated a library of all single amino acid variants (including stop codons) within the rapidly  
11 evolving portion of the v1 loop (amino acids 330 to 340, Figure 1A), with a library diversity of  
12 231 amino acid (352 nucleotide) variants (Figure 2A). The resulting TRIM5 $\alpha$  variants were  
13 stably expressed via transduction into CRFK (cat renal fibroblast) cells, which naturally lack  
14 TRIM5 $\alpha$  (McEwan et al., 2009). We transduced CRFK cells at a low dose to limit the integration  
15 of multiple variants into individual cells, thus generating a pool of cells each expressing a single  
16 TRIM5 $\alpha$  point mutant. Libraries were represented with at least 500-fold coverage through all  
17 experimental steps to avoid bottlenecks in library diversity.

18 Human TRIM5 $\alpha$  only weakly restricts HIV-1 (Jimenez-Guardeño, Apolonia, Betancor, &  
19 Malim, 2019; OhAinle et al., 2018). However, single amino acid mutations in the v1 loop can  
20 substantially increase restriction activity (Y. Li et al., 2006; Pham, Bouchard, Grütter, &  
21 Berthou, 2010; Pham et al., 2013). To comprehensively assess how many single mutation  
22 variants of human TRIM5 $\alpha$  had increased activity against HIV-1, we first performed a gain-of-  
23 function screen. We challenged the library of human TRIM5 $\alpha$  variant-expressing cells with HIV-  
24 1 bearing a GFP reporter, at a dose infecting 98% of cells (Figure 2B). Because GFP  
25 expression becomes detectable only after integration of the HIV-1 proviral genome, cells  
26 expressing TRIM5 $\alpha$  variants that restrict HIV-1 infection remain GFP-negative. However, ~2% of  
27 cells that were uninfected by chance would also be GFP-negative. Therefore, to enrich for cells  
28 expressing *bona fide* restrictive TRIM5 $\alpha$  variants, we sorted the GFP-negative cells from the  
29 first round of infection and subjected them to a second round of HIV-1-GFP infection and  
30 sorting. Following this second round of selection, we deep sequenced the TRIM5 $\alpha$  variants in  
31 the GFP-negative cell population. We normalized the count of each variant to its representation  
32 in the pre-selection cell population to determine its enrichment score, which should reflect the  
33 relative antiviral function of each TRIM5 $\alpha$  variant.

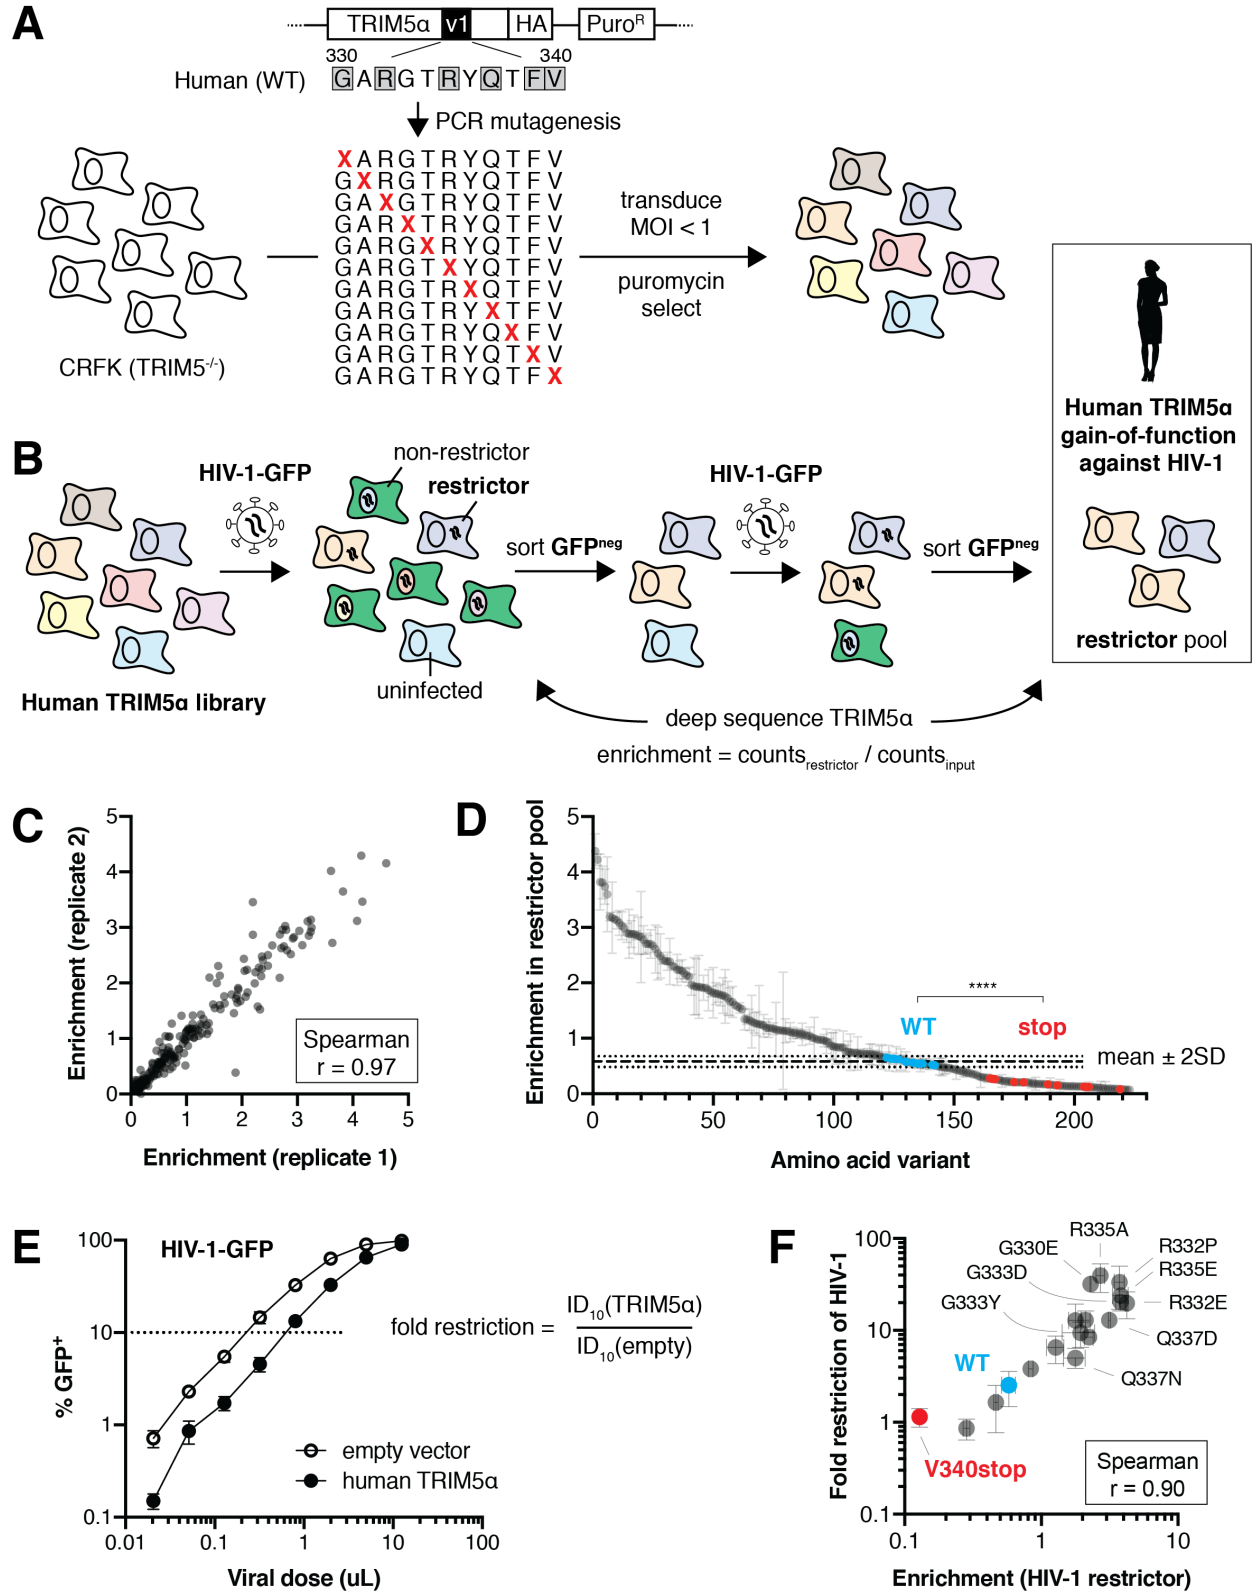

1

2 **Figure 2.** Selection scheme to identify human TRIM5α variants that gain HIV-1 restriction. (A) A  
3 DMS library, encoding all single amino acid variants within the v1 loop (rapidly evolving sites are  
4 boxed), was generated by PCR with degenerate NNS codons. The library was transduced into



1 naturally TRIM5 $\alpha$ -deficient CRFK cells at low MOI and selected using puromycin. Colors  
2 represent different TRIM5 $\alpha$  variants. **(B)** Pooled TRIM5 $\alpha$ -expressing cells were infected with  
3 HIV-1-GFP virus-like particles (VLPs) at a high dose. GFP-negative cells were FACS sorted, re-  
4 infected, and re-sorted. Restrictive TRIM5 $\alpha$  variants were then sequenced, and variant  
5 frequencies were normalized to input representation. **(C)** Amino acid enrichment scores are  
6 highly correlated across 2 biological replicates. Each dot represents a unique amino acid  
7 sequence, averaged across synonymous codons. **(D)** Nonsense variants (red) are depleted  
8 relative to WT (blue) and most missense (gray) variants; \*\*\*\* $p < 0.0001$ , student's unpaired t-  
9 test with Welch's correction. Enrichment is averaged across synonymous codons and  
10 replicates, except for WT variants, which are averaged only across replicates to better visualize  
11 variance (WT mean  $\pm$  2 standard deviations is indicated). **(E)** HIV-1 fold-restriction by TRIM5 $\alpha$   
12 was measured by the increase in ID<sub>10</sub> (viral dose at which 10% of cells are infected) relative to  
13 an empty vector control. **(F)** Enrichment scores are highly correlated with HIV-1 restriction for  
14 re-tested variants. **(D-F)** Error bars, SD.  
15

16 Enrichment scores were highly correlated between two independent biological replicates  
17 (Figure 2C, Spearman  $r = 0.97$ ). Furthermore, mutants bearing premature stop codons, which  
18 should be non-functional and depleted from the restrictor pool, were all among the most  
19 depleted variants (Figure 2D, red). Despite the weak (~2-fold) restriction of HIV-1 by wildtype  
20 (WT) human TRIM5 $\alpha$ , variants containing synonymous nucleotide changes (no amino acid  
21 changes compared to WT, blue) had significantly higher enrichment scores than those  
22 containing stop codons ( $p < 0.0001$ , student's unpaired t-test with Welch's correction),  
23 confirming that the assay worked as expected.

24 To investigate whether enrichment scores were truly representative of increased antiviral  
25 function, and to validate some of the novel amino acid changes that appeared to result in  
26 increased restriction, we made 16 targeted missense mutants from across the enrichment  
27 spectrum and challenged them individually with HIV-1-GFP. We determined their fold-restriction  
28 by determining the relative viral dose required to infect 10% of cells (ID<sub>10</sub>) expressing a TRIM5 $\alpha$   
29 variant compared to an empty vector control; a larger viral dose is required to overcome  
30 TRIM5 $\alpha$ -mediated restriction (Figure 2E). We confirmed that several previously described gain-  
31 of-function variants (Y. Li et al., 2006; Pham, Bouchard, Grütter, & Berthou, 2010; Pham et al.,  
32 2013) had increased antiviral activity and were highly enriched (Figure 2F: G330E, R332P,  
33 R332E, R335E). Moreover, we identified novel amino acid mutations that significantly increased  
34 antiviral activity, such as R335A and G333D, whereas moderately enriched variants (e.g.,  
35 G333Y, Q337N) had correspondingly modest gains in HIV-1 restriction. Indeed, enrichment  
36 scores and fold-restriction were highly correlated across all mutants tested (Spearman  $r = 0.90$ ).  
37 Thus, enrichment scores accurately reflect antiviral activity, validating our approach to



1 simultaneously identify all single mutants with increased HIV-1 restriction. Therefore, in  
2 subsequent analyses, we use enrichment scores as a proxy for the antiviral restriction activity of  
3 TRIM5α mutants.

4

#### 5 ***Most single mutations in the v1 loop improve human TRIM5α restriction of HIV-1***

6 Based on the limited amino acid diversity among primate TRIM5α v1 loops (Figure 1A-B), we  
7 expected that our DMS assay would reveal only a few beneficial mutations that improve human  
8 TRIM5α restriction of HIV-1. Contrary to this expectation, we found that more than half of all  
9 missense variants (115, 57%) had enrichment scores that fell more than two standard  
10 deviations above WT TRIM5α (Figure 2D). Even if we limited our analysis to amino acid variants  
11 that are evolutionarily accessible via single nucleotide changes from the WT *TRIM5α* sequence,  
12 this ratio did not change substantially (32, 54%). These enrichment scores represent dramatic  
13 gains in HIV-1 restriction, with the most potent variants (R332P and R335A) improving HIV-1  
14 restriction ~15-fold relative to WT (33- and 39-fold restriction, respectively). Our findings indicate  
15 that the fitness landscape of the v1 loop is not narrowly constrained, but rather is remarkably  
16 permissive (Figure 1D), in that most single amino acid changes not seen in natural sequences  
17 enhance the ability of human TRIM5α to restrict HIV-1. Thus, TRIM5α has the capacity to  
18 readily evolve antiviral potency against HIV-1 via single mutations.

19 We analyzed whether a common biochemical mechanism could explain the  
20 unexpectedly high fraction of restrictive TRIM5α variants. We found that increased expression  
21 levels could explain some of the improvement in HIV-1 restriction, although several mutations  
22 (G333D, G333Y) improved restriction without increasing expression (Figure 3—figure  
23 supplement 1). In contrast, most gains in HIV-1 restriction could be completely accounted for by  
24 a reduction in the electrostatic charge of the v1 loop (Figure 3A), regardless of expression level.  
25 For example, mutation of the positively-charged residues 332 or 335 from the WT arginine (R)  
26 to any amino acid except lysine (K) significantly improved HIV-1 restriction (Figure 3A-B),  
27 consistent with previous reports on R332 variants (Y. Li et al., 2006). Mutation of uncharged  
28 sites to K or R decreased TRIM5α restriction of HIV-1, whereas introducing a negatively-  
29 charged aspartic acid (D) or glutamic acid (E) significantly increased HIV-1 restriction (Figure  
30 3C). Since our DMS assay tests only one mutation at a time, all mutations to D or E occur in the  
31 context of at least one proximal positively-charged residue. Therefore, we infer that the position-  
32 independent benefit of introducing D or E derives from offsetting pre-existing positive charge in  
33 the v1 loop that is detrimental to HIV-1 restriction. Indeed, reducing the net charge of the v1

- 1 loop explains all of the highest enrichment scores (Figure 3D). Thus, we conclude that positive
- 2 charge in the v1 loop is the dominant impediment to HIV-1 restriction by human TRIM5α.
- 3

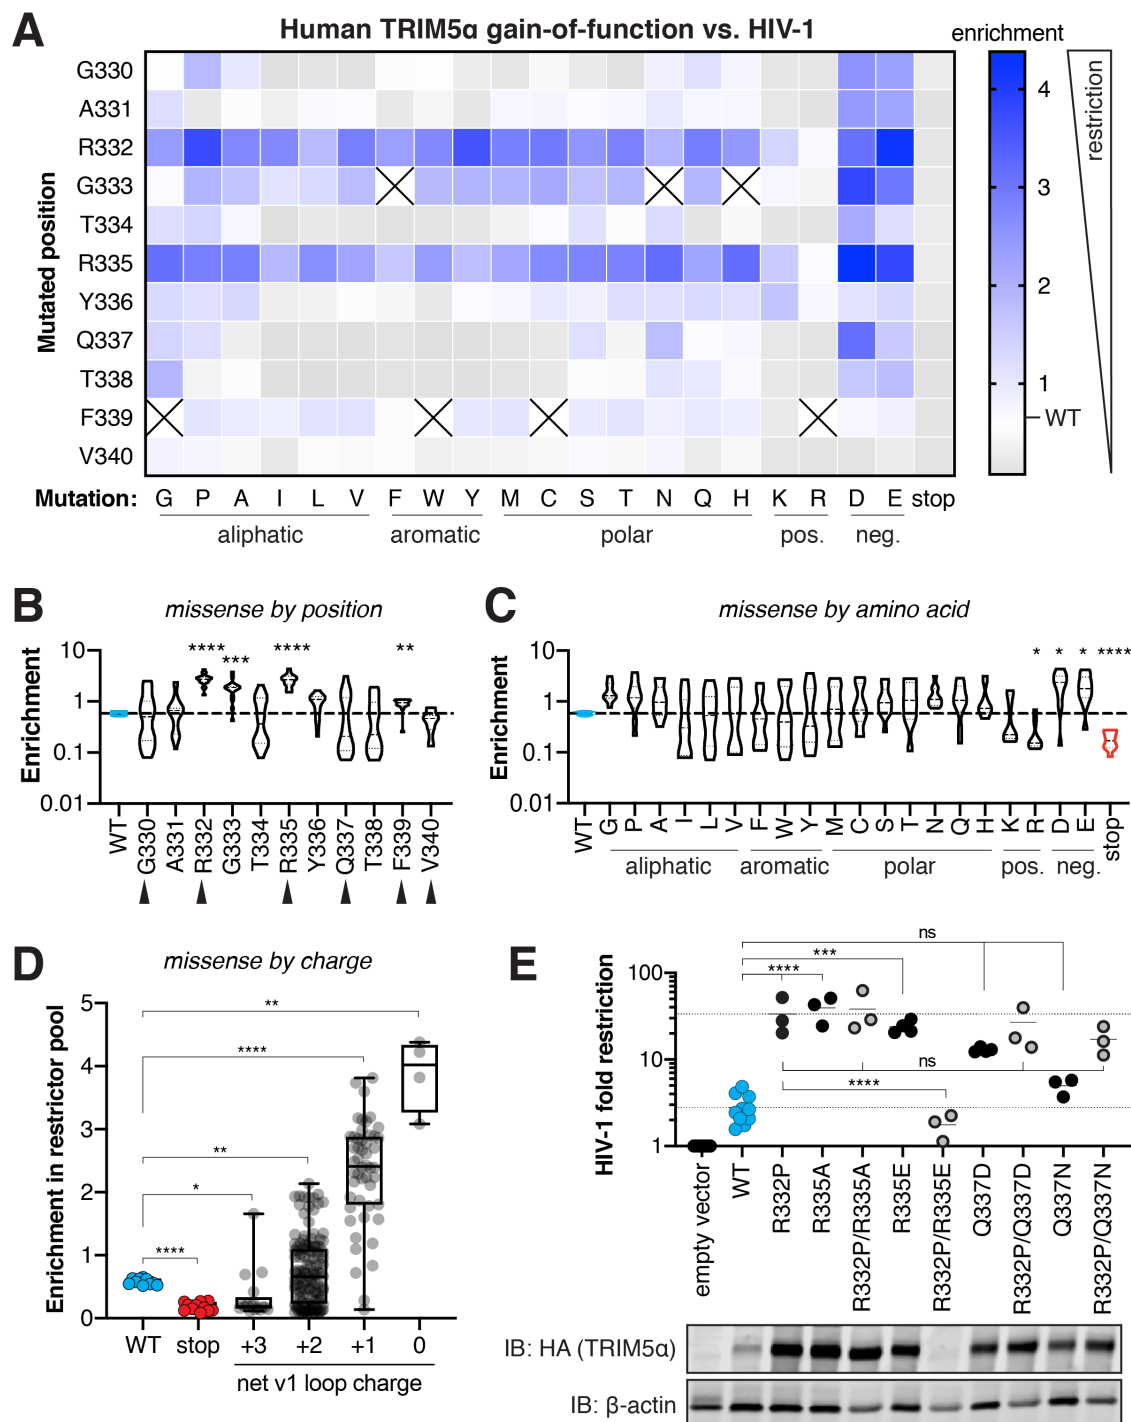

- 4
- 5 **Figure 3.** Many single mutations improve human TRIM5α restriction of HIV-1, primarily by
- 6 removal of positive charge. (A) Enrichment in the HIV-1 restrictor pool relative to WT (white) for
- 7 each TRIM5α variant, arrayed by position mutated and amino acid mutation, is indicated by
- 8 color intensity. Variants marked with X were excluded due to low input representation. (B-C)

1 Enrichment scores for each position across all amino acid variants (**B**) or each amino acid  
2 across all positions (**C**); statistics reported in comparison to WT. Rapidly evolving sites are  
3 indicated by black arrows. (**D**) Box plot of missense mutations grouped by their effect on the net  
4 v1 loop charge; WT has a net v1 charge of +2. (**E**) Gain-of-function mutations were tested  
5 against HIV-1 individually or in combination with R332P, and fold-restriction was determined as  
6 in Figure 2E. TRIM5 $\alpha$  expression levels in CRFK cells was analyzed by immunoblot (IB) against  
7 the C-terminal HA tag. (**B-E**) \* $p < 0.05$ , \*\* $p < 0.01$ , \*\*\* $p < 0.001$ , \*\*\*\* $p < 0.0001$ ; one-way  
8 ANOVA with Holm-Sidak's correction for multiple comparisons and (**B-D**) correction for unequal  
9 variances.  
10  
11

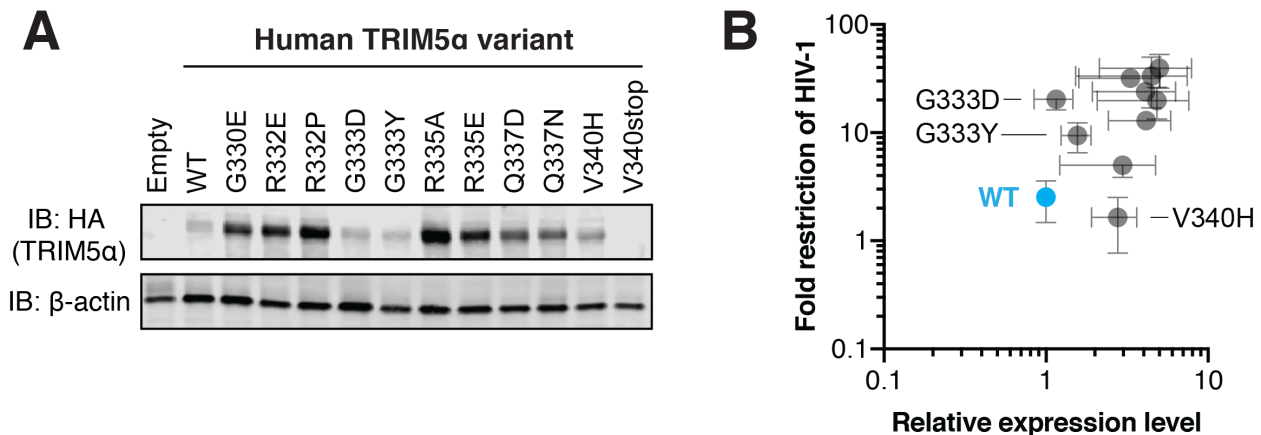

12  
13 **Figure 3—figure supplement 1.** Some, but not all, human TRIM5 $\alpha$  gain-of-function mutations  
14 against HIV-1 increase TRIM5 $\alpha$  expression level. (**A**) Representative immunoblot (IB) for  
15 TRIM5 $\alpha$  expression in CRFK cells. (**B**) TRIM5 $\alpha$ -HA band intensity was normalized to  $\beta$ -actin,  
16 and then further normalized to WT TRIM5 $\alpha$  to determine relative expression. Results from 3  
17 independent experiments. HIV-1 restriction was calculated in Figure 2F. Error bars, SD.  
18

19 Removal of positive charge, however, could not explain all of the improved HIV-1  
20 restriction we observed. For example, despite its strict conservation in primate TRIM5 $\alpha$  (Figure  
21 1A), a glycine (G) at residue 333 compromises HIV-1 restriction. Mutation of G333 to most other  
22 amino acids significantly improves TRIM5 $\alpha$  activity (Figure 3B). We confirmed this finding for  
23 several individual variants (Figure 2F: G333Y, G333D). We found a similar pattern for residue  
24 F339, which is disfavored for HIV-1 restriction, albeit not to the same extent as G333. Contrary  
25 to our initial expectations, there is only a weak association between rapidly evolving residues  
26 and residues whose mutation can significantly improve HIV-1 restriction: missense mutations in  
27 3 of 6 rapidly evolving sites, versus 1 of 5 conserved sites, significantly improve HIV-1 restriction  
28 (Figure 3B). This result suggests that conserved positions in the vicinity of rapidly evolving sites  
29 possess unexpected potential to improve antiviral potency.

1           We also tested whether beneficial mutations might have additive effects on HIV-1  
2 restriction by human TRIM5 $\alpha$ . We combined several gain-of-function variants with the R332P  
3 mutation, previously described to potently restrict HIV-1 (Yap et al., 2005). However, we found  
4 that no double mutants tested increased HIV-1 restriction beyond that of R332P alone (Figure  
5 3E). Instead, combination of one gain-of-function variant (R335E) with R332P resulted in loss of  
6 protein expression and HIV-1 restriction. Previous reports also found beneficial mutations to be  
7 either non-additive or interfering (Y. Li et al., 2006; Pham et al., 2010; 2013). Collectively, these  
8 results suggest that single mutations can confer most or all of the increased HIV-1 restriction  
9 potential onto human TRIM5 $\alpha$ . Thus, remarkably, human TRIM5 $\alpha$  appears to be located only  
10 one mutational step away from the numerous fitness peaks in its evolutionary landscape of  
11 adaptation against HIV-1.

12           Finally, we investigated whether gain-of-function mutations for HIV-1 restriction also  
13 conferred protection against other lentiviruses. We focused on lentiviruses that are v1 loop-  
14 dependent: either the entire v1 loop (Figure 4—figure supplement 1) or the R332P mutation  
15 from rhesus TRIM5 $\alpha$  (Stremlau, Perron, Welikala, & Sodroski, 2005) could confer human  
16 TRIM5 $\alpha$  with substantial antiviral function. In each case, WT human TRIM5 $\alpha$  only weakly  
17 restricts these lentiviruses (Figure 4A). However, the charge-altering mutations R332P and  
18 R335A increased restriction of all lentiviruses we tested, including HIV-2, SIVcpz (SIV infecting  
19 chimpanzees), and SIVmac (SIV infecting rhesus macaques). Introduction of negative charge  
20 (R332E, R335E, G330E, G333D, and G337D) also selectively improved restriction of HIV-1,  
21 SIVcpz, and HIV-2 but not SIVmac. Thus, positive charge at positions 332 and 335 appears to  
22 be generally detrimental for lentiviral restriction. Furthermore, although TRIM5 $\alpha$  fitness  
23 landscapes are lentivirus-specific, many of the mutations we tested increased restriction against  
24 other lentiviruses. These data suggest that the evolutionary landscape for lentiviral restriction by  
25 TRIM5 $\alpha$  is likely to be generally permissive, as it is for HIV-1.

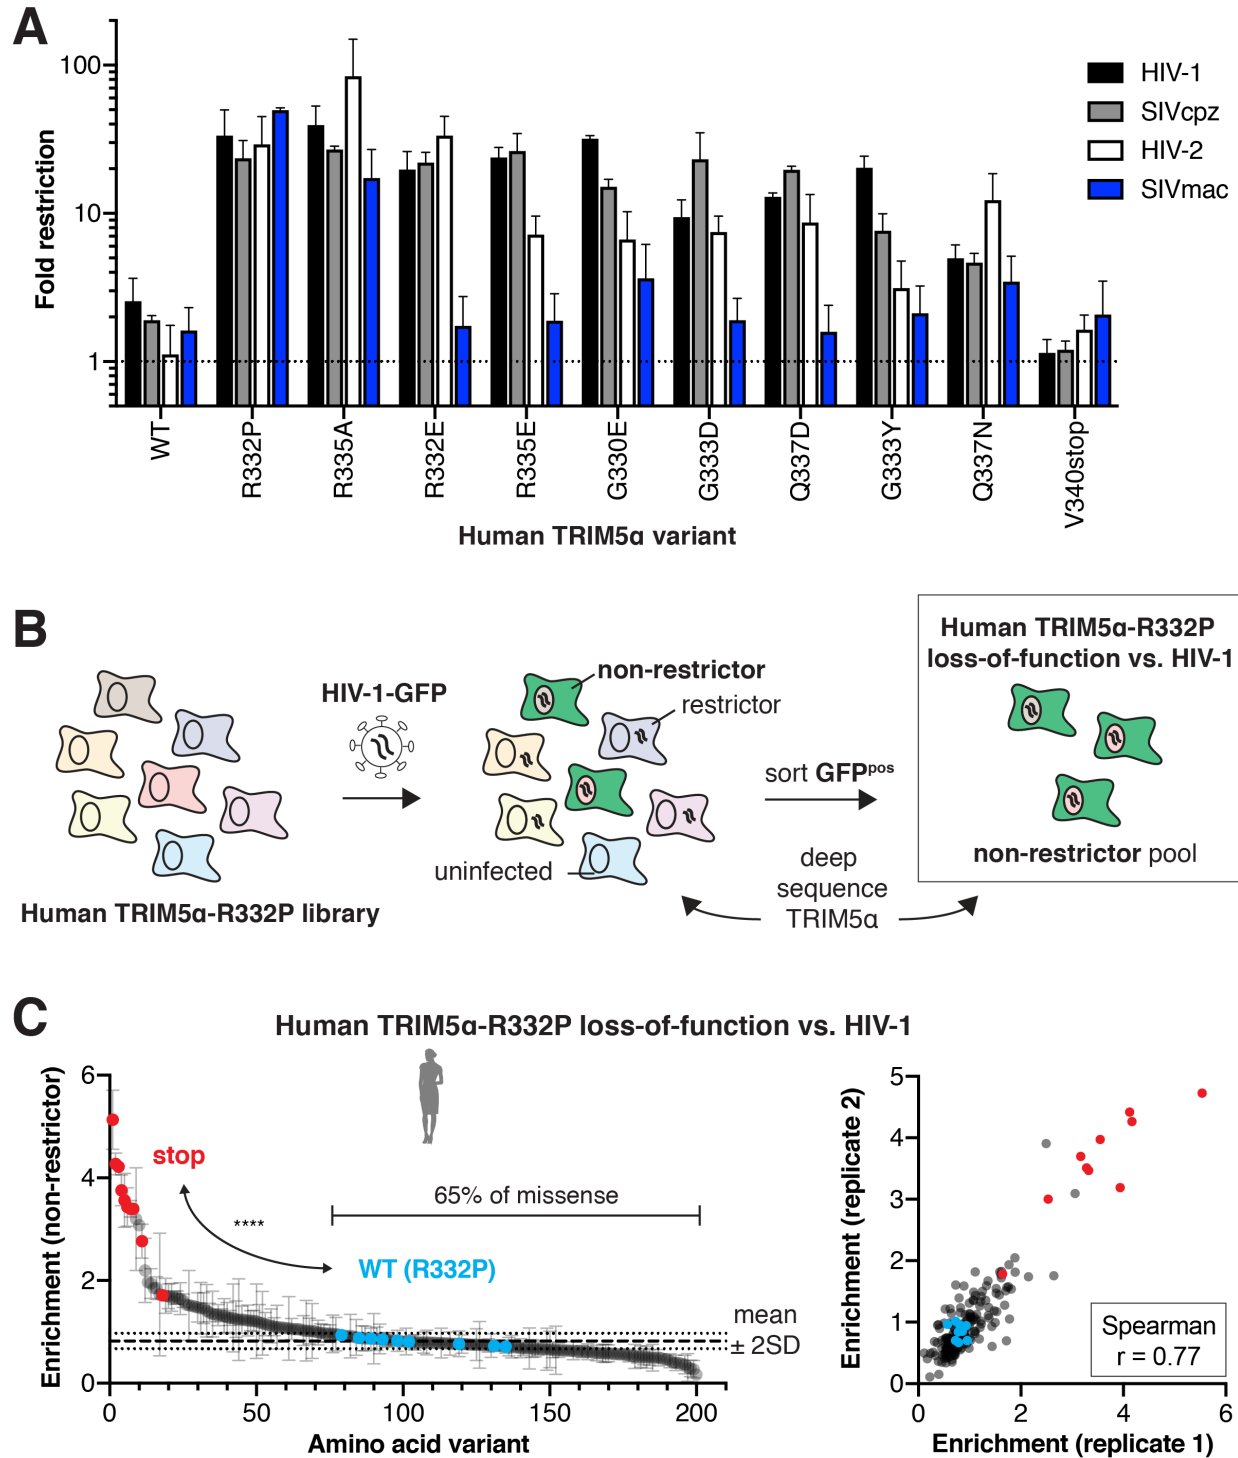

1  
2  
3  
4  
5  
6  
7  
8

**Figure 4.** Evolutionary landscapes are generally permissive for evolving novel lentiviral restriction, which is resilient to most mutations once achieved. **(A)** CRFK cells expressing the indicated human TRIM5 $\alpha$  variant were challenged with GFP-marked lentiviral VLPs to determine fold-restriction as in Figure 2E. **(B)** To determine whether newly acquired viral restriction tolerates mutations, a second human TRIM5 $\alpha$  v1 DMS library was generated with R332P fixed in all variants. This library of cells was infected with HIV-1-GFP VLPs, and GFP-

1 positive (non-restrictor) cells were sorted and sequenced. (C) Stop codon variants are highly  
2 enriched in the non-restrictor pool compared to WT (R332P, blue) variants (\*\*\*\*p < 0.0001,  
3 student's unpaired t-test with Welch's correction), while 65% of all missense variants fall less  
4 than 2 SD above WT (R332P) mean. Enrichment scores between two biological replicates are  
5 well correlated. (A, C) Error bars, SD.

6  
7

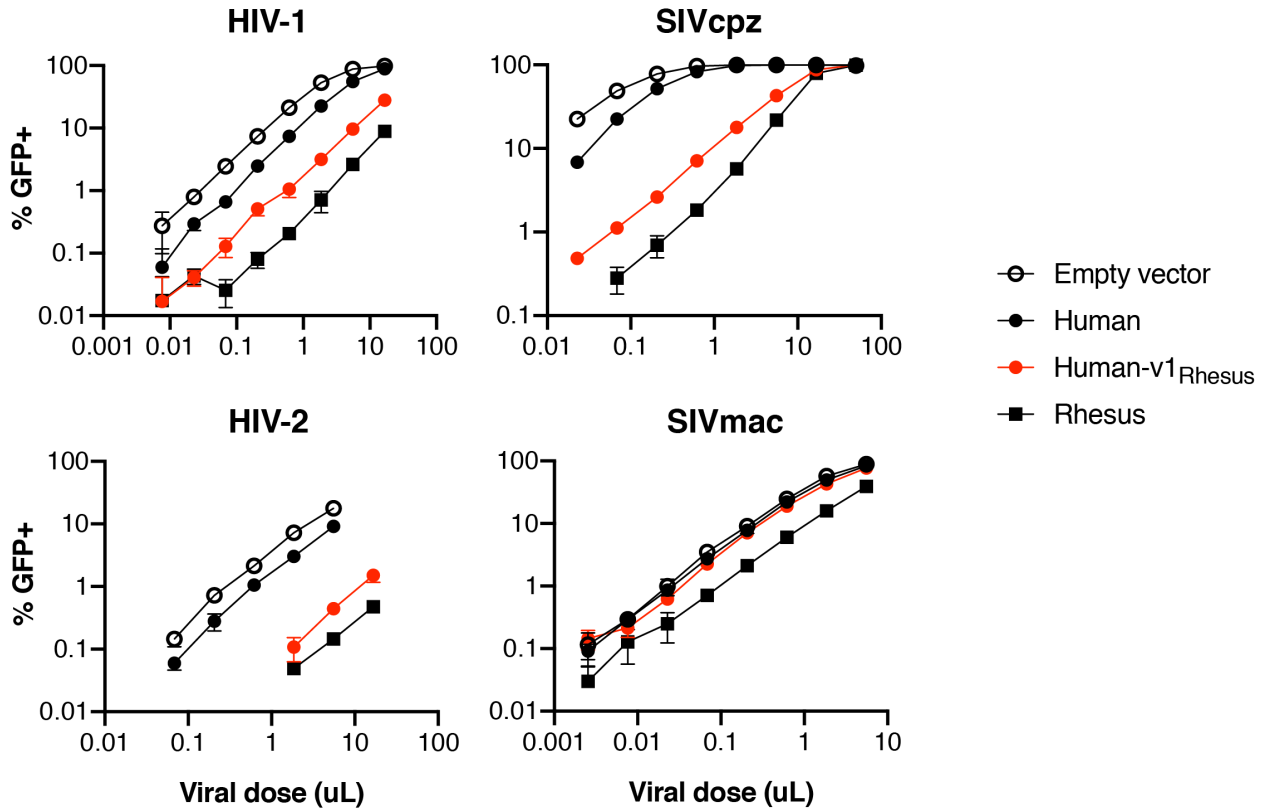

8  
9

10 **Figure 4—figure supplement 1.** Lentiviral restriction by TRIM5α is v1-dependent. CRFK cells  
11 expressing human, rhesus, or human TRIM5α with the v1 loop exchanged for that of rhesus  
12 were challenged with GFP-marked lentiviral VLPs. Results representative of at least 3  
13 independent experiments.

14

### 15 ***TRIM5α restriction of HIV-1 is resilient to single mutations***

16 Our data show that novel antiviral potency is readily attainable by single amino acid changes in  
17 human TRIM5α (Figures 2D, 4A). However, these gains might be just as easily lost through  
18 further mutation, since rapidly evolving antiviral proteins like TRIM5α continually adapt in their  
19 arms race with viruses. Therefore, in order to test whether newly acquired antiviral potency is  
20 fragile or resistant to mutation, we investigated the mutational resilience of the R332P variant of  
21 human TRIM5α, which inhibits HIV-1 ~15-fold more than WT (Figure 2F). To do so, we  
22 generated a v1 DMS library of human TRIM5α with R332P fixed in all variants. We challenged

1 this pooled cell library with HIV-1-GFP, at a viral titer which human TRIM5 $\alpha$ -R332P restricts to  
2 ~1% infection. In this case, we sorted and deep sequenced GFP-positive cells, so that  
3 enrichment (relative to initial representation) now reflects the degree to which each TRIM5 $\alpha$ -  
4 R332P variant lost its antiviral function against HIV-1 (Figure 4B). As expected, we observed  
5 strong enrichment of stop codons in the non-restrictor pool and good correlation between  
6 biological replicates (Figure 4C).

7         As with WT human TRIM5 $\alpha$ , addition of positive charge by mutations to K or R at most  
8 positions in the v1 loop reduced HIV-1 restriction (Figure 4—figure supplement 2). However, we  
9 found that the majority of missense variants (65%) did not, in fact, weaken HIV-1 restriction by  
10 the R332P variant of human TRIM5 $\alpha$ . Thus, WT human TRIM5 $\alpha$  is only one mutational step  
11 away from a fitness peak (Figure 3) that, once achieved, also exhibits a surprising degree of  
12 resilience to mutation. This implies that gains of restriction by TRIM5 $\alpha$  are not likely to be  
13 compromised by its continued adaptation.



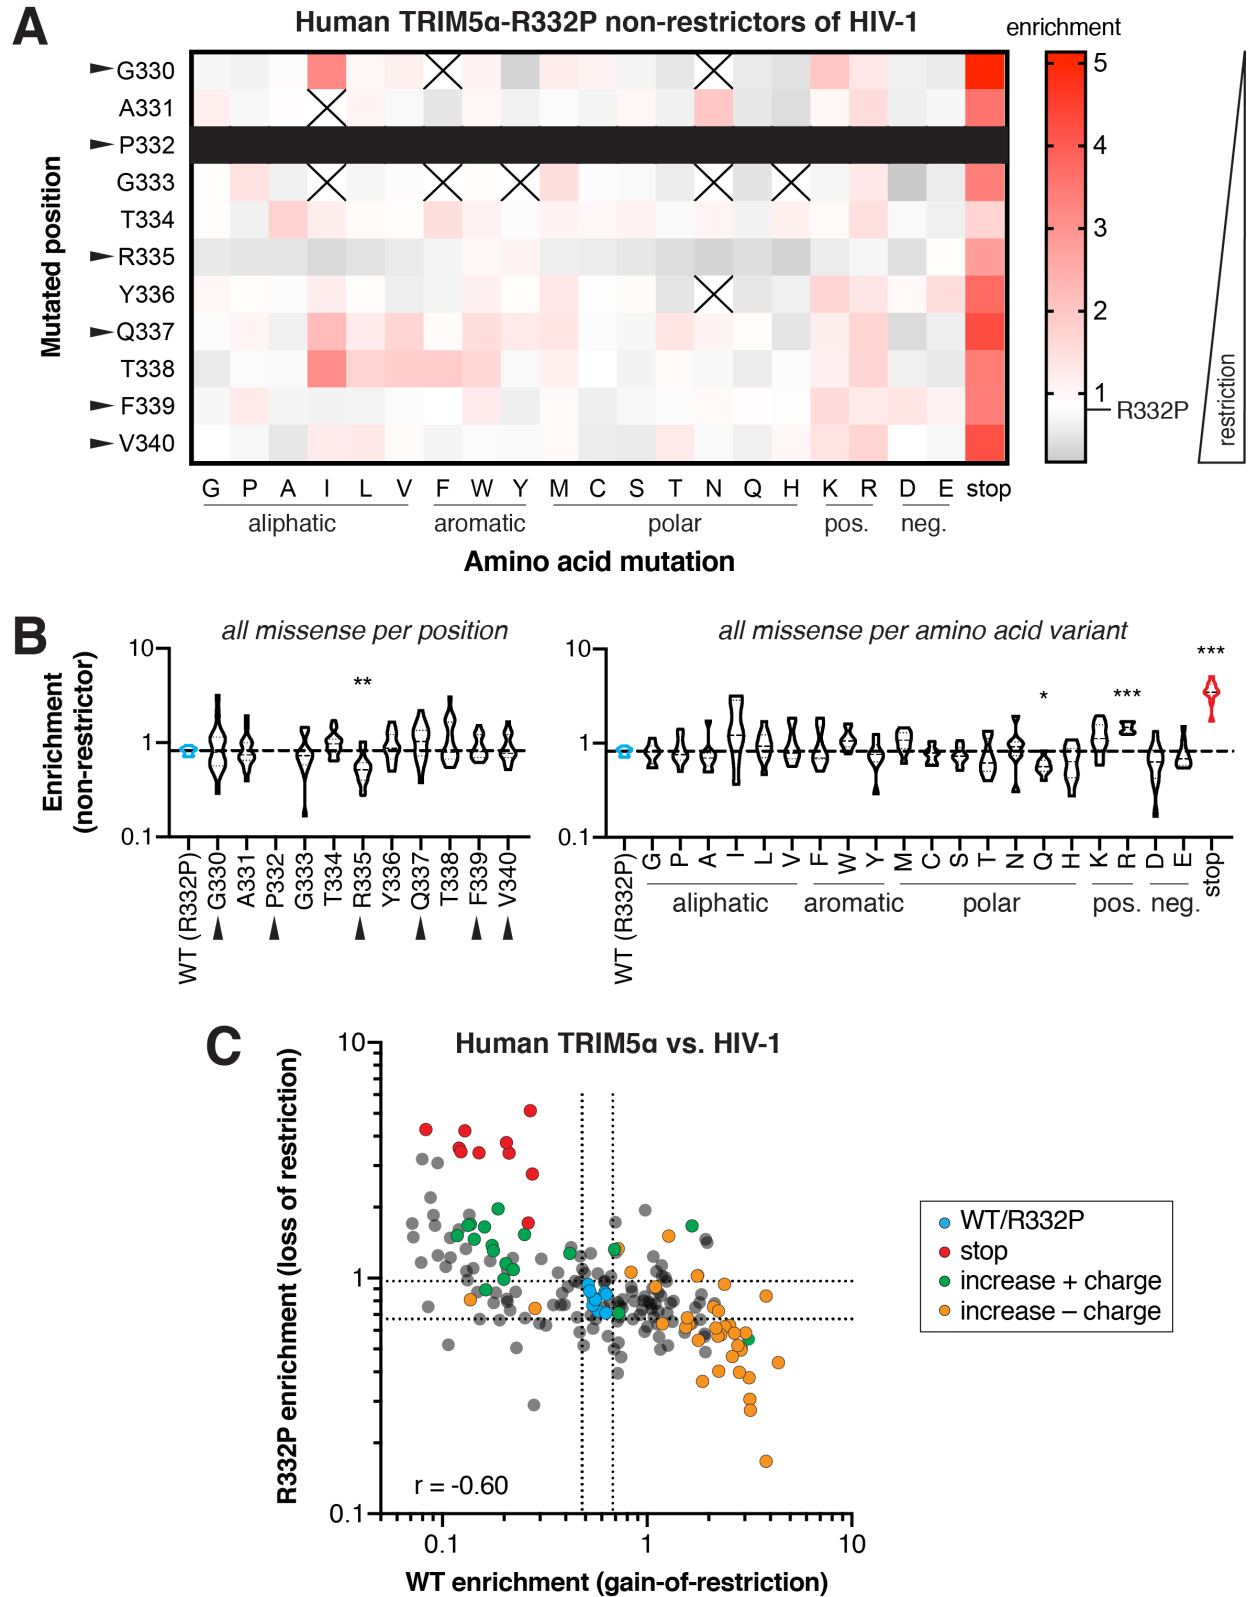

1  
2  
3  
4

**Figure 4—figure supplement 2.** Biochemical preferences for human TRIM5 $\alpha$ -R332P restriction of HIV-1. **(A)** Enrichment in the HIV-1 non-restrictor pool relative to R332P (white) for

1 each human TRIM5 $\alpha$ -R332P variant, arrayed by position and amino acid variant, is indicated by  
2 color intensity. Variants marked with X were excluded due to low input representation; no  
3 variation was present at position 332 (black box). Arrows indicate rapidly evolving sites. (B)  
4 Missense variants at each position (across all variants) or each amino acid (across all  
5 positions); one-way ANOVA compared to R332P with corrections for multiple comparisons  
6 (Holm-Sidak) and unequal variances (Geisser-Greenhouse); \* $p < 0.05$ , \*\* $p < 0.01$ , \*\*\* $p < 0.001$ ,  
7 \*\*\*\* $p < 0.0001$ . (C) Positive charge is detrimental to human TRIM5 $\alpha$  restriction of HIV-1, both for  
8 WT and R332P variants (Spearman  $r = -0.60$ ). Missense mutations that increase positive  
9 charge (green) weaken R332P restriction, while those that negate positive charge (orange)  
10 improve WT restriction of HIV-1. Dashed lines indicate 2 SD above or below the mean  
11 enrichment for WT variants (blue) in each screen.  
12

13 To determine if HIV-1 restriction is also resilient to mutation in a naturally-occurring  
14 TRIM5 $\alpha$  variant, we next assessed the likelihood that random mutations disrupt viral restriction  
15 by WT rhesus macaque TRIM5 $\alpha$ , which strongly restricts HIV-1 in a manner that strictly requires  
16 the v1 loop (Sawyer et al., 2005). Like with human TRIM5 $\alpha$ , we constructed a library of cells  
17 each expressing a single rhesus TRIM5 $\alpha$  variant, with each variant containing a single mutation  
18 in the v1 loop (note that the v1 loop is slightly longer in macaques compared to humans, Figure  
19 1A). We then challenged this pool of cells with HIV-1-GFP and sorted GFP-positive cells for  
20 subsequent deep sequencing. Rhesus TRIM5 $\alpha$  variants containing premature stop codons were  
21 strongly enriched in the non-restrictor pool, whereas WT variants were significantly depleted  
22 (Figure 5A). In contrast, half of all missense mutations (125, 51%) fell within two standard  
23 deviations of WT. Even missense mutations accessible by single nucleotide changes reflected  
24 this pattern (40, 55%).

25 By re-testing individual variants, we confirmed that enrichment scores negatively  
26 correlate with antiviral potency (Figure 5B). We tested seven variants enriched for loss-of-  
27 restriction (more than 2 standard deviations above WT) and found that six lost HIV-1 restriction.  
28 The seventh variant (L337N) was only slightly outside the two standard-deviation cut-off for  
29 enrichment and correspondingly only slightly worse than WT in terms of HIV-1 inhibition. Thus,  
30 enrichment in the non-restrictor pool represents *bona fide* loss of restriction. All the rhesus  
31 TRIM5 $\alpha$  variants we report here represent novel loss-of-function mutations. Their loss of HIV-1  
32 restriction cannot be explained by loss of expression or protein stability (Figure 5C). For  
33 example, the F340D, P341I, and P341G variants were all expressed at WT levels but lost HIV-1  
34 restriction. Moreover, the T344E variant retained restriction despite reduced expression levels.

35 We also re-tested ten rhesus TRIM5 $\alpha$  variants not significantly enriched for loss-of-  
36 restriction (Figure 5B). Two variants (P334M, G335I) enriched one standard deviation above

1 WT correspondingly retained only partial HIV-1 restriction relative to WT rhesus TRIM5α. The  
 2 eight remaining variants retained HIV-1 inhibition, consistent with their lack of enrichment  
 3 relative to WT. Based on this validation, we conclude that roughly half of all v1 loop single point  
 4 mutations do not significantly reduce HIV-1 restriction by rhesus TRIM5α. Thus, a natural  
 5 rhesus TRIM5α antiviral variant, much like the human TRIM5α-R332P variant, displays  
 6 considerable mutational resilience.

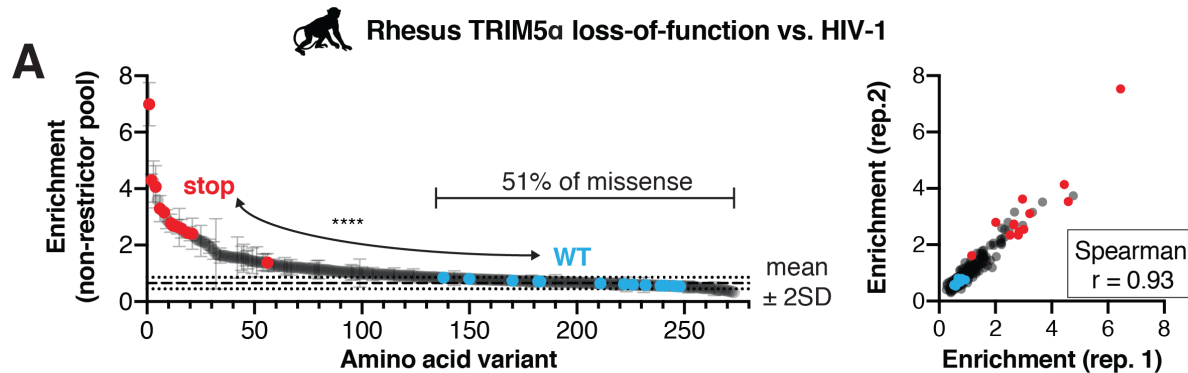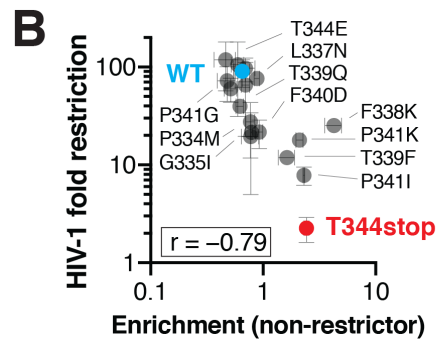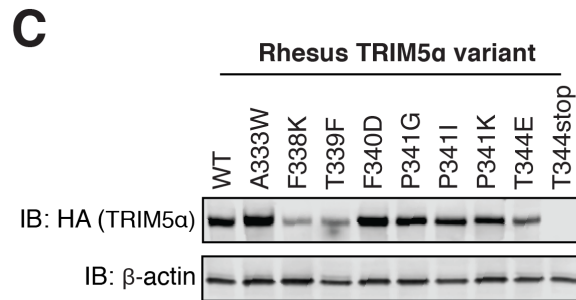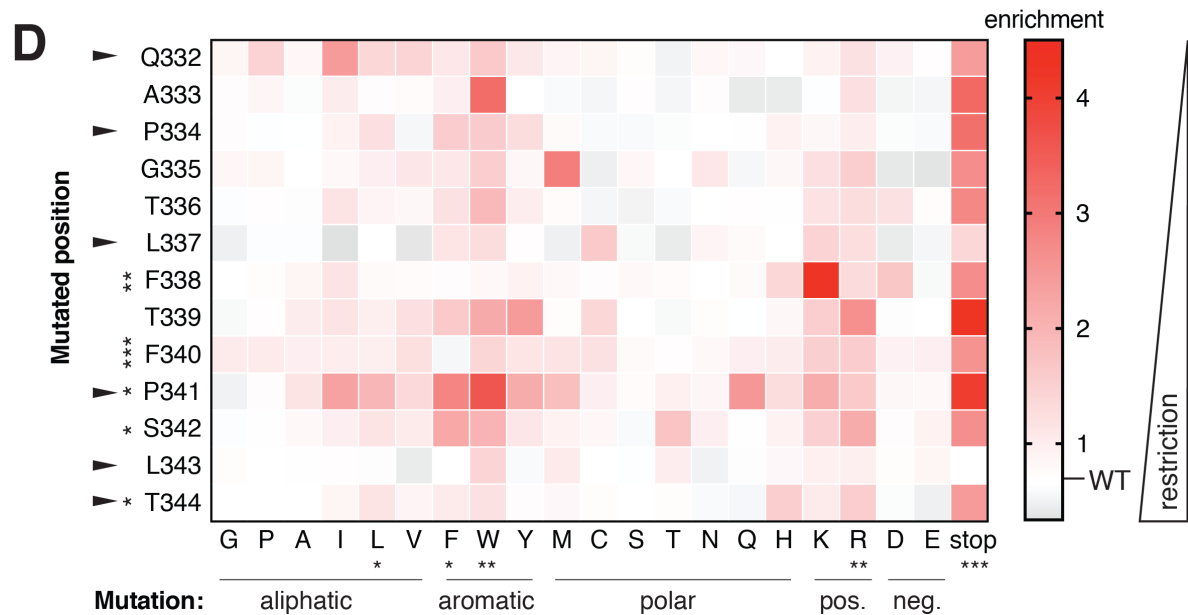

7

1 **Figure 5.** Rhesus macaque TRIM5 $\alpha$  restriction of HIV-1 tolerates many mutations. A rhesus  
2 TRIM5 $\alpha$  v1 DMS library was infected with HIV-1-GFP VLPs, and GFP-positive (non-restrictor)  
3 cells were sorted and sequenced. **(A)** Nonsense variants are highly enriched in the non-  
4 restrictor pool compared to WT (\*\*\*\* $p < 0.0001$ , student's unpaired t-test with Welch's  
5 correction), while half of all missense variants fall less than 2 SD above WT. Enrichment scores  
6 between two biological replicates are highly correlated. **(B)** Re-testing individual variants  
7 confirms that enriched variants have partially lost HIV-1 restriction, while depleted variants do  
8 not differ from WT. Spearman  $r$ ; error bars, SD. **(C)** Steady-state levels of TRIM5 $\alpha$  variants  
9 stably expressed in CRFK cells. **(D)** Enrichment in the HIV-1 non-restrictor pool relative to WT  
10 (white) for each variant, arrayed by position and amino acid mutation, is indicated by color  
11 intensity. The color scale was slightly compressed to avoid exaggerating a single mutant  
12 (L343stop) with enrichment  $> 4.5$ . Rapidly evolving sites are indicated with arrows. Statistical  
13 tests compare each position (across all variants) or each amino acid (across all positions) to  
14 WT, one-way ANOVA with Geisser-Greenhouse non-sphericity and Holm-Sidak's multiple  
15 comparisons corrections; \* $p < 0.05$ , \*\* $p < 0.01$ , \*\*\* $p < 0.001$ , \*\*\*\* $p < 0.0001$ .

16  
17 We expected that conserved residues should be less tolerant of changes than rapidly  
18 evolving sites. However, we found that mutations in only 3 of 7 conserved sites, versus 2 of 6  
19 rapidly evolving sites, led to significant loss of function (Figure 5D). Collectively, these results  
20 indicate that rhesus TRIM5 $\alpha$  restriction of HIV-1 is highly robust to changes within the critical v1  
21 loop at both rapidly evolving and conserved sites. The biochemical preferences for HIV-1  
22 restriction are similar but not identical between rhesus and human TRIM5 $\alpha$ . In both cases, the  
23 introduction of positive charge, particularly R, weakened HIV-1 inhibition (Figure 5D, compare to  
24 Figure 3C). In contrast, the introduction of bulky hydrophobic residues, including leucine (L),  
25 phenylalanine (F), and tryptophan (W), significantly impaired HIV-1 restriction by rhesus  
26 TRIM5 $\alpha$  but did not affect the potency of human TRIM5 $\alpha$ . These data suggest that both  
27 universal as well as lineage-specific requirements for the v1 loop shape TRIM5 $\alpha$  restriction of  
28 HIV-1.

29 Our findings with TRIM5 $\alpha$  restriction of HIV-1 suggest that single mutations can readily  
30 achieve gain-of-function. In contrast, loss-of-function mutations are not so abundant as to make  
31 adaptation unlikely. Thus, the evolutionary landscape of TRIM5 $\alpha$  appears to resemble 'rolling  
32 hills' (Figure 1D) rather than rare, sharp peaks (Figure 1C).

33

### 34 ***Resilience of antiviral restriction is a general property of TRIM5 $\alpha$ adaptation***

35 Our DMS analyses of human TRIM5 $\alpha$  revealed unexpected ease of gaining antiviral potency  
36 against HIV-1 and potentially other lentiviruses. However, gains in potency against one virus  
37 might be offset by a concomitant loss of function against other viruses, as previously seen for  
38 the antiviral protein MxA (Colón-Thillet et al., 2019). Such functional tradeoffs might partially

1 explain the evolutionary constraints acting on primate TRIM5 $\alpha$  sequences. To explore this  
2 possibility, we investigated the mutational resilience of N-tropic murine leukemia virus (N-MLV)  
3 restriction by TRIM5 $\alpha$ . N-MLV is strongly inhibited by both rhesus and human TRIM5 $\alpha$ , and this  
4 activity is at least partly dependent on the v1 loop (Ohkura et al., 2006; Perron et al., 2006). We  
5 infected cells expressing either the rhesus (Figure 6A) or WT human TRIM5 $\alpha$  (Figure 6B) v1  
6 DMS libraries with GFP-marked N-MLV, sorted GFP-positive cells, and sequenced the non-  
7 restrictor variants. For both selections, stop codon variants were significantly more enriched  
8 than WT variants in the non-restrictor pool.

9

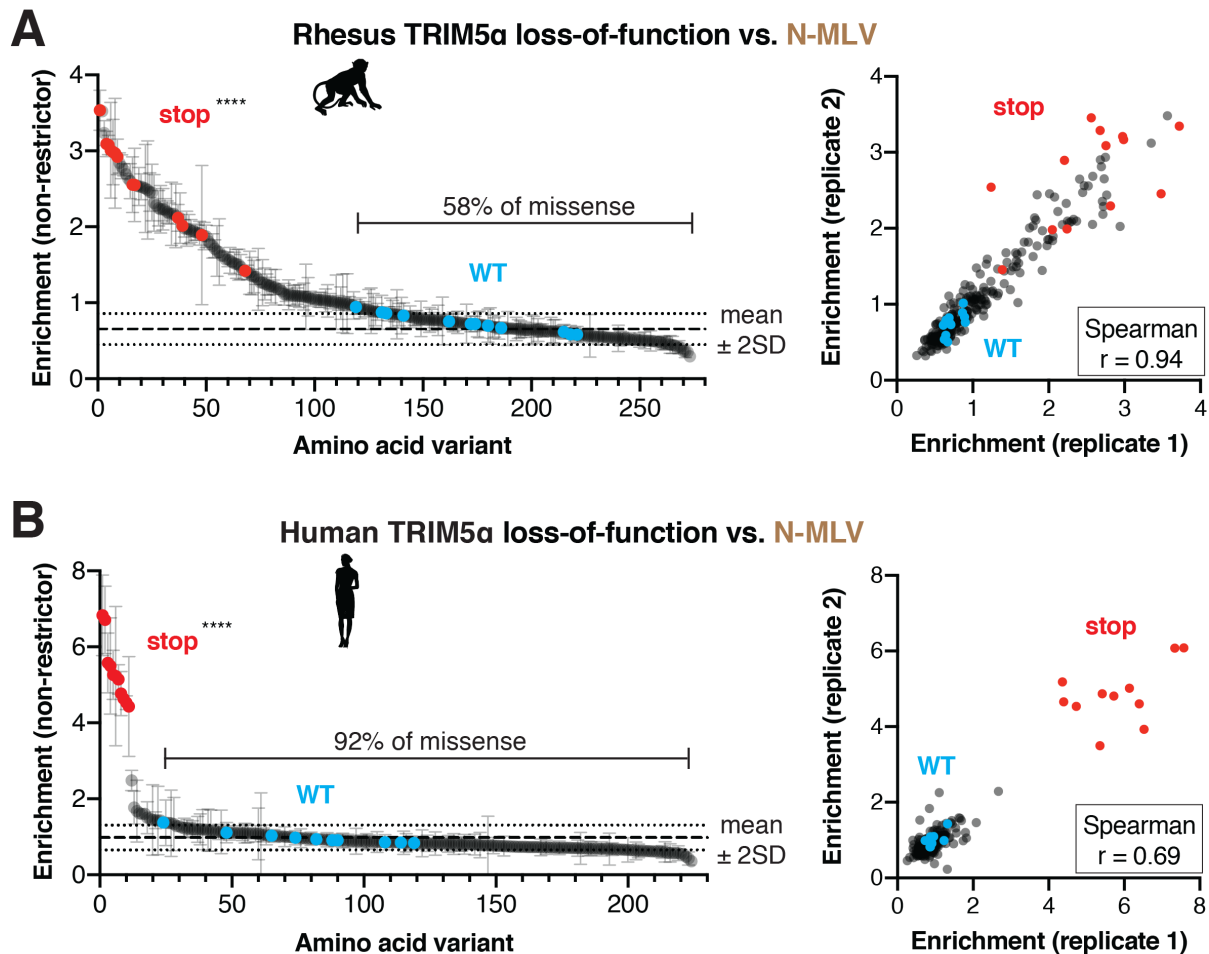

10

11 **Figure 6.** N-MLV restriction by primate TRIM5 $\alpha$  is robust to single point mutants. The rhesus  
12 (A) or WT human (B) v1 DMS libraries were infected with N-MLV-GFP VLPs, and GFP-positive  
13 (non-restrictor) cells were sorted and sequenced. Nonsense variants are highly enriched in the  
14 non-restrictor pool compared to WT in both screens; \*\*\*\* $p < 0.0001$ , student's unpaired t-test  
15 with Welch's correction. Error bars, SD. The fraction of all missense variants less than 2SD  
16 above WT mean is indicated. Enrichment scores between two biological replicates are highly  
17 correlated.

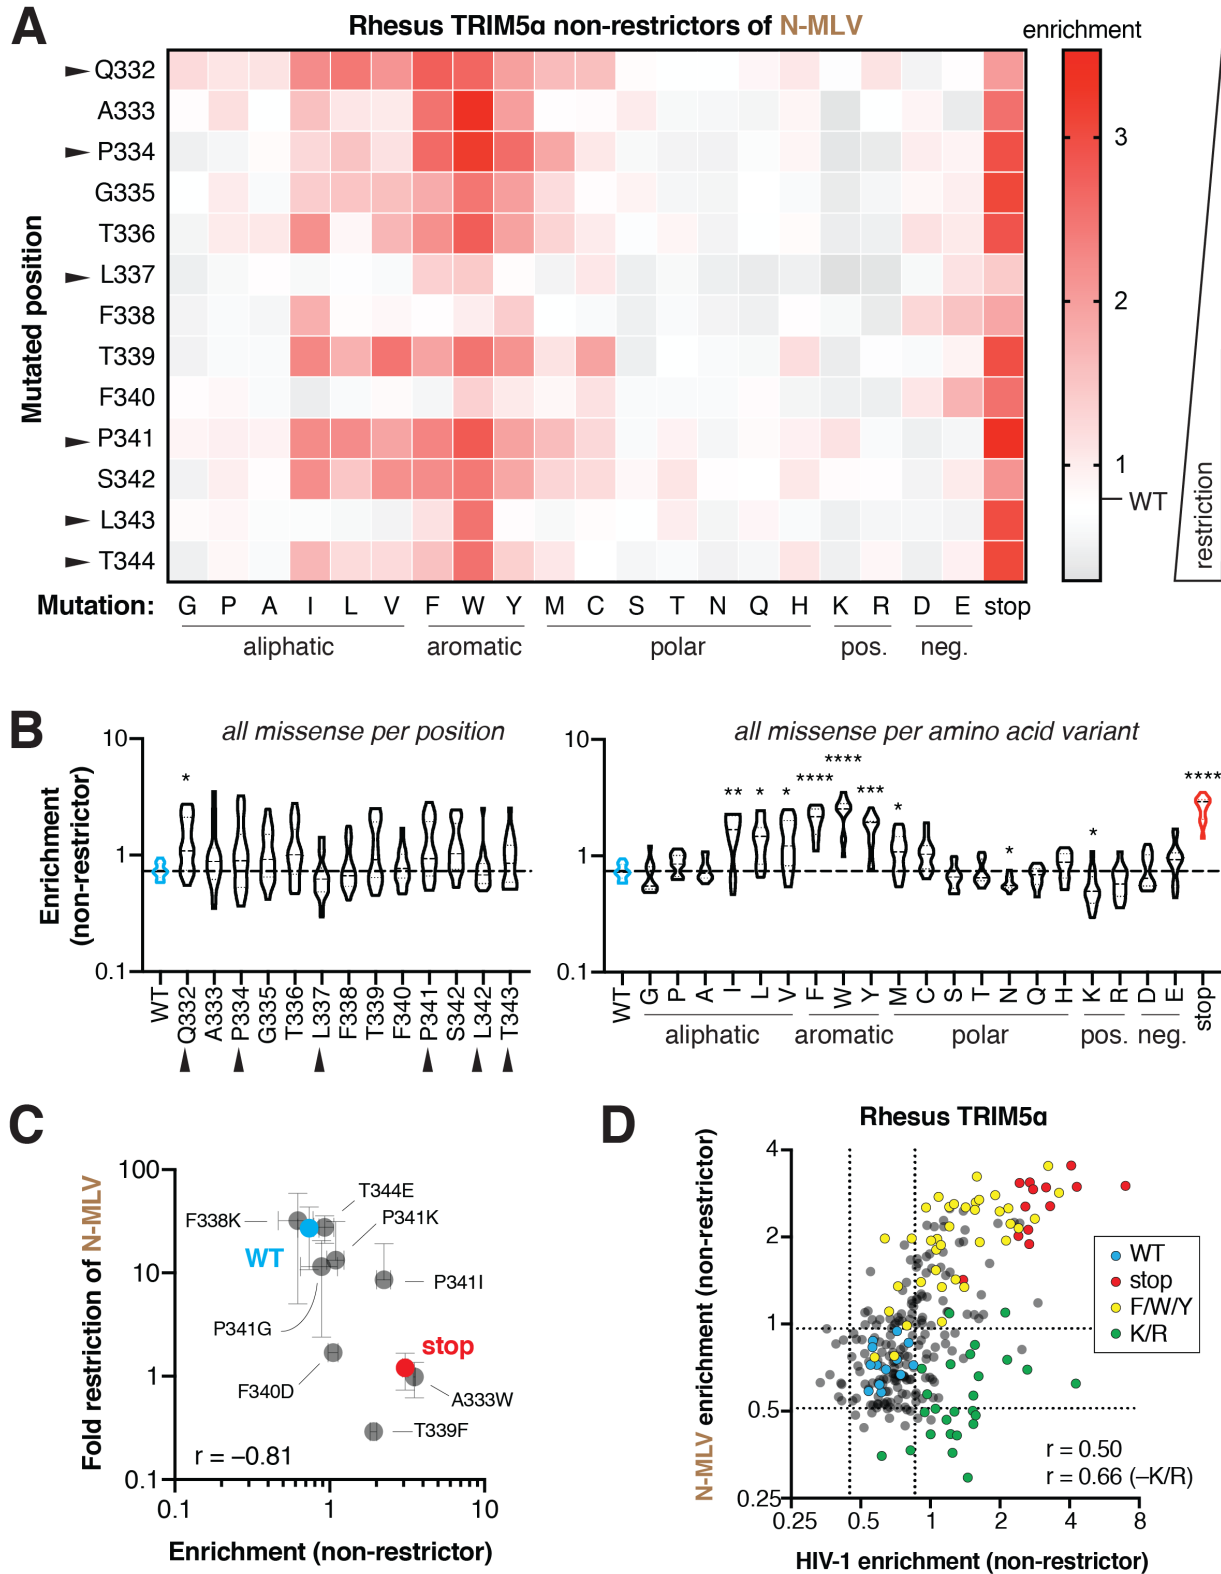

1  
 2 **Figure 6—figure supplement 1.** Biochemical preferences for rhesus TRIM5a restriction of N-  
 3 MLV are distinct from HIV-1. **(A)** Enrichment scores in the N-MLV non-restrictor pool for each  
 4 variant are arrayed by position and amino acid mutation. Enrichment (decreased restriction, red)  
 5 relative to WT (white) is indicated by color intensity. **(B)** Missense variants at each position



1 (across all variants) or each amino acid (across all positions); one-way ANOVA compared to  
2 WT with Geisser-Greenhouse non-sphericity and Holm-Sidak's multiple comparisons  
3 corrections; \* $p < 0.05$ , \*\* $p < 0.01$ , \*\*\* $p < 0.001$ , \*\*\*\* $p < 0.0001$ . (C) Re-testing individual  
4 mutations confirms that enriched mutants have lost restriction (Spearman  $r = -0.81$ ). Error bars,  
5 SD. (D) Rhesus TRIM5 $\alpha$  restriction of HIV-1 and N-MLV has partially overlapping biochemical  
6 requirements. Positive charge (K/R, green) breaks only HIV-1 restriction, whereas stop codons  
7 (red) and aromatic residues (F/W/Y, yellow) weaken restriction of both viruses. Excluding K and  
8 R improves the correlation compared to all variants (Spearman  $r = 0.66$  or  $0.50$ , respectively).  
9 Dashed lines indicate 2 SD above and below the mean enrichment for WT variants (blue) in  
10 each screen.

11  
12 Similar to HIV-1 restriction, we found that most missense mutations (143, 58%) in rhesus  
13 TRIM5 $\alpha$  were tolerated for N-MLV restriction (Figure 6A). However, some missense mutations  
14 dramatically reduced N-MLV restriction, affirming that the v1 loop is indeed critical for inhibition  
15 of N-MLV (Figure 6—figure supplement 1A-C). In particular, hydrophobic and especially  
16 aromatic residues at most positions in the v1 loop significantly decreased N-MLV restriction.  
17 This preference against aromatic residues is similar between HIV-1 and N-MLV restriction.  
18 However, N-MLV restriction is insensitive to the introduction of positively charged residues,  
19 which disrupt HIV-1 inhibition (Figure 6—figure supplement 1D). These results indicate that the  
20 evolutionary landscape for rhesus TRIM5 $\alpha$  against N-MLV is distinct from that of HIV-1.  
21 Nevertheless, the overall degree of mutational resilience against both viruses is remarkably  
22 similar: less than half of all missense mutations disrupt restriction of either virus.

23 Human TRIM5 $\alpha$  restriction of N-MLV was even more resilient to mutation than rhesus  
24 TRIM5 $\alpha$ . Almost all variants (187, 92%) had no effect on N-MLV restriction (Figure 6B, Figure  
25 6—figure supplement 2). Indeed, our selection for non-restrictive variants only strongly enriched  
26 for stop codons. This extreme mutational resilience may reflect the massive potency (>250-fold  
27 restriction, data not shown) of human TRIM5 $\alpha$  against N-MLV, and/or a decreased reliance on  
28 the v1 loop for N-MLV recognition by human TRIM5 $\alpha$  (Perron et al., 2006). We validated several  
29 human TRIM5 $\alpha$  mutants as retaining nearly WT levels of N-MLV restriction (Figure 6—figure  
30 supplement 2C). Thus, both rhesus and human TRIM5 $\alpha$  inhibition of N-MLV is highly resistant  
31 to mutations, allowing mutational flexibility without loss of pre-existing antiviral restriction. These  
32 results, in conjunction with the substitution tolerance of HIV-1 restriction by human R332P and  
33 WT rhesus TRIM5 $\alpha$ , indicate that mutational resilience is a general property of TRIM5 $\alpha$ 's rapidly  
34 evolving v1 loop.



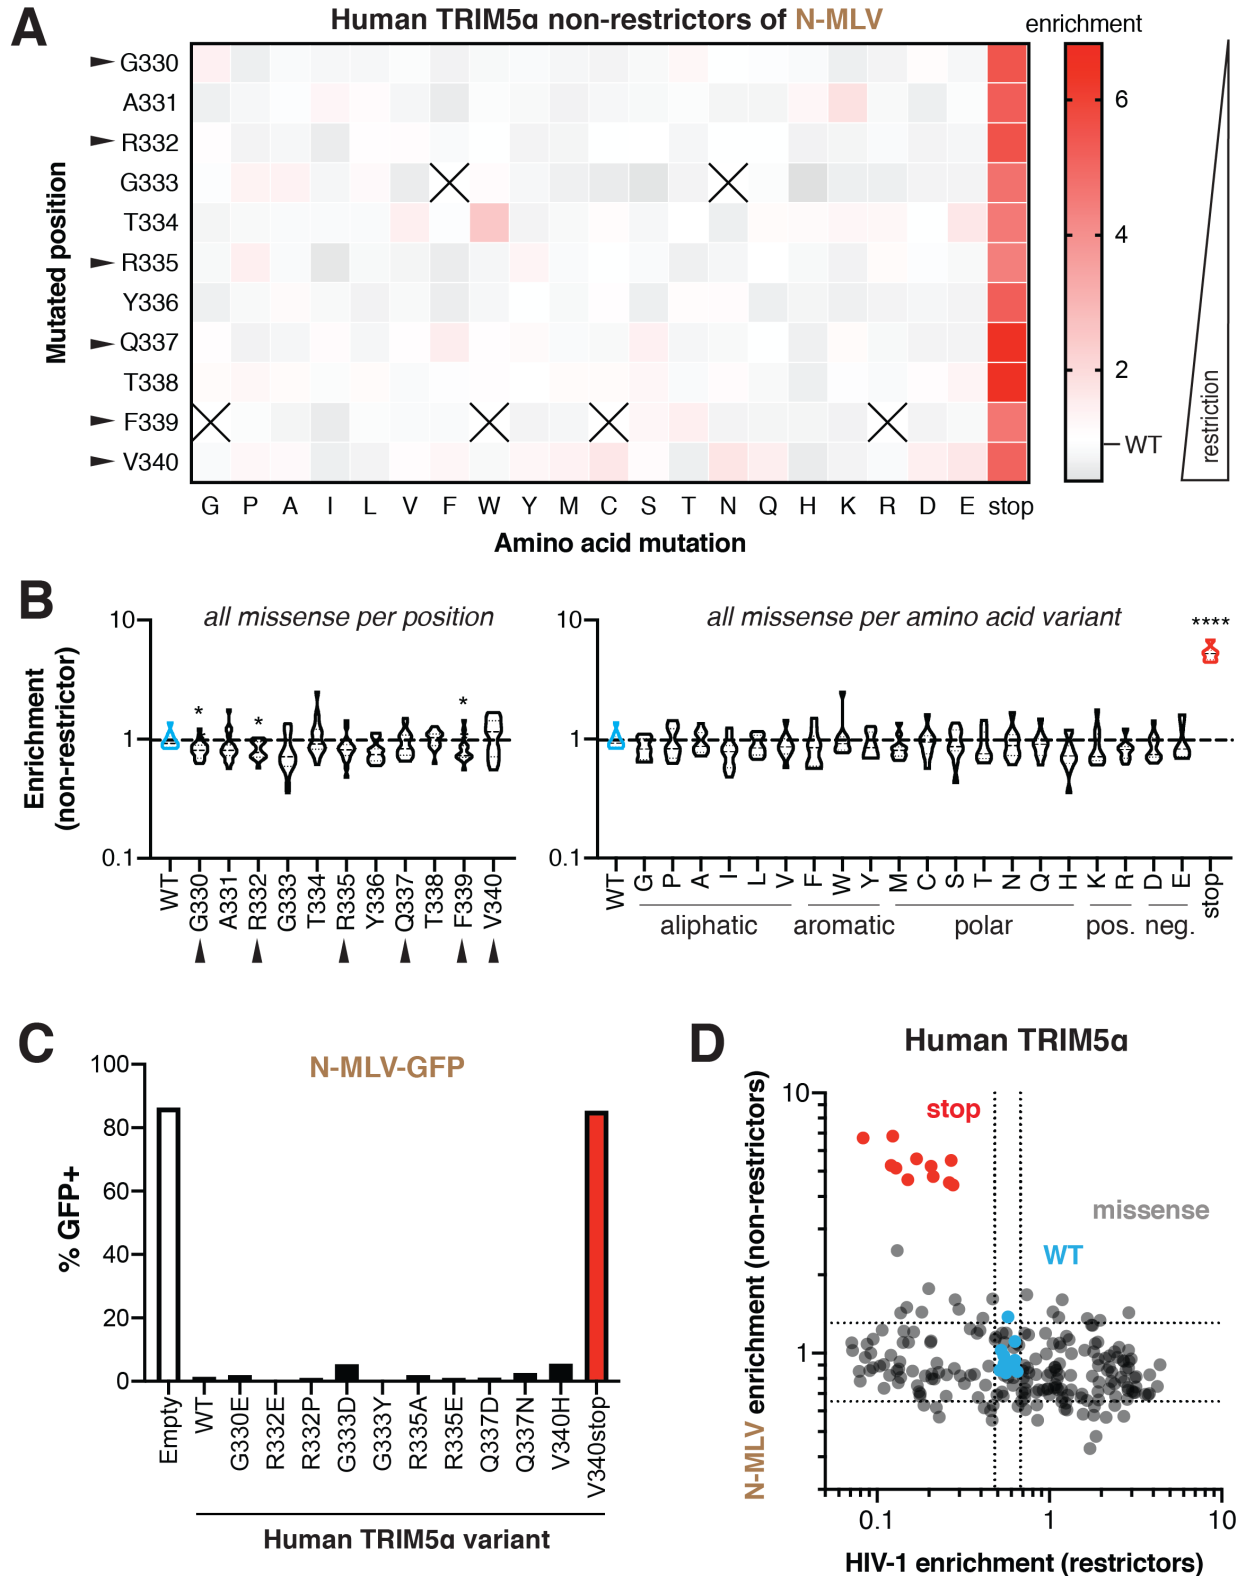

1  
2 **Figure 6—figure supplement 2.** Missense mutations do not disrupt human TRIM5α restriction  
3 of N-MLV. (A) Enrichment scores in the N-MLV non-restrictor pool for each variant are arrayed  
4 by position and amino acid mutant. Enrichment (decreased restriction, red) relative to WT  
5 (white) is indicated by color intensity. Variants marked with X were excluded due to low input

1 representation. Rapidly evolving residues are indicated with black arrows. **(B)** Missense variants  
2 at each position (across all variants) or each amino acid (across all positions); one-way ANOVA  
3 compared to WT with Geisser-Greenhouse non-sphericity and Holm-Sidak's multiple  
4 comparisons corrections; \* $p < 0.05$ , \*\* $p < 0.01$ , \*\*\* $p < 0.001$ , \*\*\*\* $p < 0.0001$ . **(C)** Re-testing  
5 individual mutations confirms that mutations have little effect on N-MLV restriction. Results are  
6 representative of at least 3 independent experiments. **(D)** HIV-1 gain-of-restriction compared to  
7 N-MLV loss-of-restriction. No anti-correlation is evident, with the exception of stop codons (red).  
8 Dashed lines indicate 2 SD above and below the mean enrichment for WT variants (blue) in  
9 each screen.

10

## 11 **DISCUSSION**

12 Antiviral restriction factors are locked in high-stakes tit-for-tat evolutionary arms races with  
13 target viruses. However, viruses would appear to have the upper hand in these battles because  
14 of their higher mutation rates, shorter generation times, and larger population sizes. Although  
15 host genomes have the advantage of encoding a diverse, polygenic immune response,  
16 evolutionary constraints acting on innate immune genes could curtail their adaptive potential.  
17 Here, using deep-mutational scanning approaches combined with viral infection assays, we  
18 investigated the evolutionary landscape of adaptation of the most rapidly evolving segment, the  
19 disordered v1 loop, of the retroviral restriction factor TRIM5 $\alpha$ . We focused on this loop because  
20 of its critical role in adapting to changing viral repertoires.

21 We found two attributes of this evolutionary landscape that favor host immune evolution.  
22 First, human TRIM5 $\alpha$  readily gains significant HIV-1 restriction: roughly half of all single  
23 missense mutations allow human TRIM5 $\alpha$  to better restrict HIV-1 (Figures 2-3). Based on our  
24 results, we infer that positive charge is the dominant impediment to HIV-1 inhibition in human  
25 TRIM5 $\alpha$  (Figure 3D). Removal of this positive charge improved human TRIM5 $\alpha$  restriction not  
26 only of HIV-1 but also of multiple lentiviruses (Figure 4A). Recent findings revealed that  
27 cyclophilin A (CypA) protects the HIV-1 capsid from TRIM5 $\alpha$  recognition (Kim et al., 2019;  
28 Selyutina et al., 2020; Veillette et al., 2013). Although structural studies currently lack sufficient  
29 resolution to observe the molecular details of the TRIM5 $\alpha$ -capsid interaction, we speculate that  
30 positive charge in the v1 loop impairs an interaction between TRIM5 $\alpha$  and the capsid's CypA-  
31 binding site via electrostatic repulsion. Given the almost universally detrimental impact of  
32 positive charge on lentiviral restriction, the fixation of positive charge during the evolution of  
33 hominid TRIM5 $\alpha$  is perplexing (Figure 1A). We have not identified a candidate virus driving this  
34 fixation, for which we might expect a positive charge in the v1 loop to be beneficial. However,  
35 since the critical R332 was fixed at the common ancestor of humans, chimps, and bonobos ~10  
36 million years ago, it is possible that this viral challenge was a paleovirus that has since gone

1 extinct. Another possibility is that positive charge did not aid in gaining new antiviral specificity,  
2 but rather has a function independent of viral capsid recognition, such as suppressing innate  
3 immune signaling in the absence of infection (Lascano, Uchil, Mothes, & Luban, 2015; Pertel et  
4 al., 2011; Tareen & Emerman, 2011).

5 Surprisingly, our comprehensive DMS analyses also revealed that both rapidly evolving  
6 and conserved residues can contribute to antiviral adaptation (Figure 3B). For instance, many  
7 variants at position 333 of human TRIM5 $\alpha$  led to increased restriction of HIV-1 and other  
8 lentiviruses (Figures 3A, 4A). Thus, it is unclear why simian primates have retained a glycine at  
9 this position (333 in human, 335 in macaques). One possibility is that changes in this residue  
10 might be generally deleterious for TRIM5 $\alpha$  function, yet subsequent analyses revealed little or  
11 no impairment of TRIM5 $\alpha$  antiviral functions (Figure 5D, Figure 6—figure supplement 1A, Figure  
12 6—figure supplement 2A). This suggests that conservation of G333 either reflects some cellular  
13 constraint or was recurrently selected for by a viral lineage distinct from the viruses we tested  
14 here (HIV-1 and N-MLV).

15 Our analyses uncovered a second unexpected, advantageous aspect of TRIM5 $\alpha$ 's  
16 evolutionary landscape: its antiviral restriction displays remarkable mutational resilience across  
17 multiple orthologs and against two divergent retroviruses. 51-92% of all possible missense  
18 variants retain antiviral activity (Figure 6—figure supplement 3). This resilience is manifest even  
19 when potent antiviral activity is newly acquired via a single mutation, as with the R332P variant  
20 of human TRIM5 $\alpha$  against HIV-1. Therefore, we conclude that the fitness landscape of  
21 TRIM5 $\alpha$ 's rapidly evolving v1 loop resembles 'rolling hills' (Figure 1D), in which valleys are  
22 infrequent and only one evolutionary step removed from mutationally-tolerant plateaus.

23 TRIM5 $\alpha$ 's permissive landscape contrasts with the relative inflexibility of ligand-binding  
24 domains in the core of evolutionarily conserved proteins (Guo et al., 2004; McLaughlin et al.,  
25 2012; Suckow et al., 1996). However, these studies found increased mutational tolerance in  
26 peripheral, disordered loops, such as those employed for viral ligand binding by TRIM5 $\alpha$  as well  
27 as MxA (Mitchell et al., 2012). The use of flexible loops thus grants rapidly evolving restriction  
28 factors mutational flexibility without significant risk of disrupting core protein structure.  
29 Intriguingly, TRIM5 $\alpha$ 's reliance on the v1 loop for specificity mirrors that of antibodies'  
30 dependence on complementarity-defining loops for antigen recognition. Indeed, a high degree  
31 of mutational tolerance within complementarity-defining loops allows somatic hypermutation to  
32 significantly increase antibody-antigen affinity (P. S. Daugherty, Chen, Iverson, & Georgiou,  
33 2000; Sheng et al., 2017).

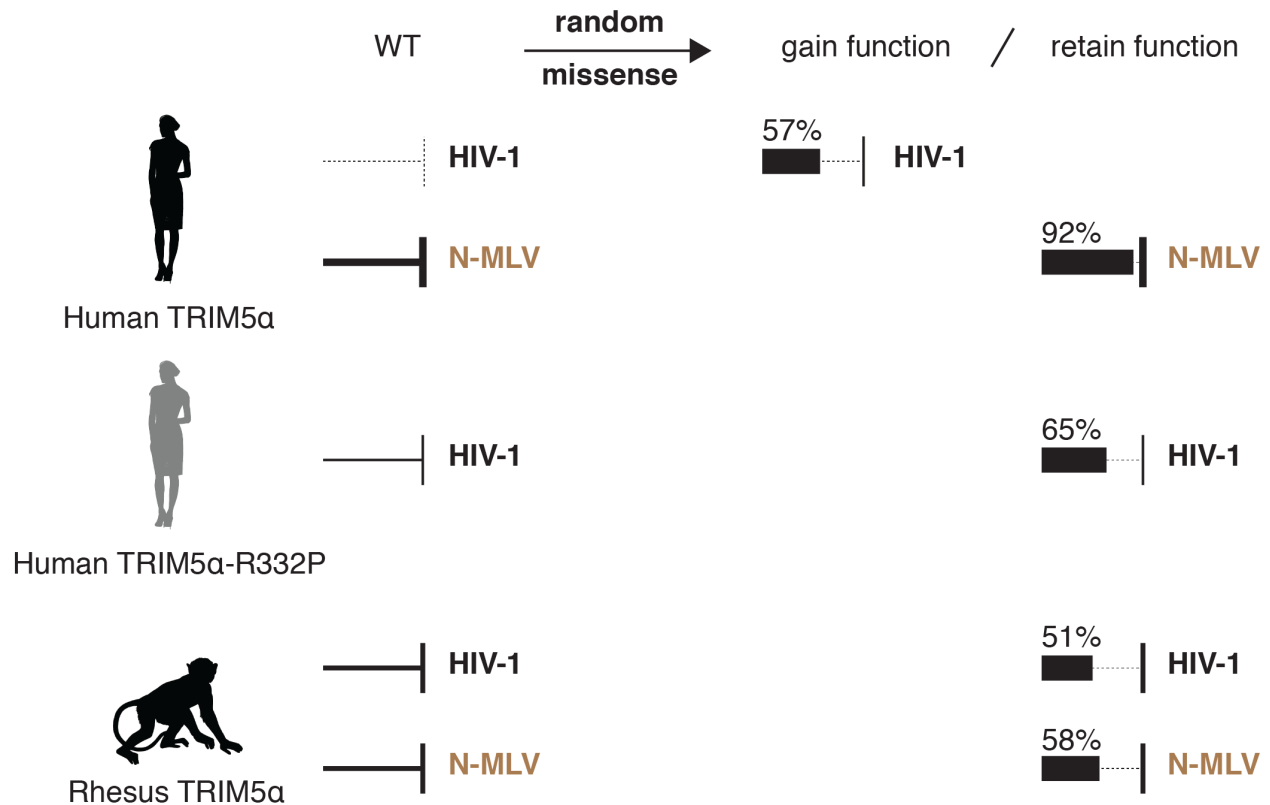

**Figure 6—figure supplement 3.** Summary of deep mutational scanning results. Random missense mutations in human TRIM5α frequently improve HIV-1 restriction. Multiple TRIM5α orthologs, including a *de novo* HIV-1 restrictor (human TRIM5α-R332P), display high mutational resilience against two distantly related retroviruses. Arrow thickness represents antiviral potency; the fraction of missense mutants that gain or retain function are indicated.

Overall, our analyses reveal not only many paths for TRIM5α to gain antiviral function but also an unexpectedly low probability of losing antiviral function via single mutations. Such landscapes should be highly advantageous to host genomes in evolutionary arms races with viruses. Mutational tolerance allows the accumulation of neutral variants that do not compromise antiviral function among antiviral genes in a population. Many of these novel variants may carry the capacity to restrict additional viruses, whether these result from cross-species transmissions or mutations that allow species-matched viruses to evade recognition by the dominant antiviral allele. Indeed, mutational tolerance has been shown to facilitate the evolution of *de novo* functions through the accumulation of neutral mutations (Draghi, Parsons, Wagner, & Plotkin, 2010; Hayden, Ferrada, & Wagner, 2011). Although rare in human populations (Clarke et al., 2017), extensive polymorphism within the v1 loop of TRIM5α in Old World monkeys results in diverse antiviral repertoires that have been maintained by balancing

1 selection (Newman et al., 2006). Thus, antiviral proteins such as TRIM5 $\alpha$  appear to evolve with  
2 low-cost, high-gain fitness landscapes that favor their success in co-evolutionary battles with  
3 rapidly evolving retroviruses.

4

## 5 **MATERIALS AND METHODS**

### 6 ***Plasmids and cloning***

7 All virus-like particles (VLPs) were generated using three plasmids to ensure a single round of  
8 infectivity: a pseudotyping plasmid for transient expression of the VSV-G envelope protein  
9 (pMD2.G, Addgene plasmid #12259, gift from Didier Trono), a plasmid for transient expression  
10 of the viral gag/pol, and a transfer vector encoding a green fluorescent protein integration  
11 reporter between the corresponding viral LTRs. HIV-1 VLPs were made with the transfer vector  
12 pHIV-ZsGreen (B. E. Welm, Dijkgraaf, Bledau, Welm, & Werb, 2008); HIV-2 and SIV VLPs used  
13 the pALPS-eGFP transfer vector (McCauley et al., 2018); and N-MLV was made with pQCXIP-  
14 eGFP, encoding GFP between the EcoRI and ClaI sites of pQCXIP (P.S. Mitchell, unpublished).  
15 HIV-1 VLPs were made with p8.9NdSB bGH BlnI BstEII, encoding the NL4.3 HIV-1 gag/pol  
16 (Berthoux, Sebastian, Sokolskaja, & Luban, 2004). HIV-2 VLPs used a chimeric gag/pol, in  
17 which the HIV-1 CA sequence (residues 1-202) was replaced by HIV-2<sub>ROD</sub> (p8.9NdSB bGH BlnI  
18 BstEII HIV-2 CA) (Pizzato et al., 2015). For SIV VLPs, pCRV1-based gag/pol chimeric vectors  
19 replaced the HIV-1 CA-NTD (residues 1-146) with the corresponding residues of either  
20 SIVmac239, a virus passaged in rhesus macaques, here SIVmac (pHIV-MAC, containing an  
21 A77V mutation); or SIVcpzGab2, a natural isolate from chimpanzee, here SIVcpz (pHIV-Gb2)  
22 (Kratovac et al., 2008). N-MLV VLPs were generated using pCIG3N, encoding the N-MLV  
23 gag/pol (Bock, Bishop, Towers, & Stoye, 2000). For stable expression of TRIM5 $\alpha$  constructs  
24 from pQCXIP, the MLV gag/pol was transiently expressed from JK3; the pseudotyping envelope  
25 protein was transiently expressed from the L-VSV-G plasmid and driven by expression of Tat  
26 from the CMV-Tat plasmid.

27 C-terminally HA-tagged human, human with the rhesus macaque v1 loop, and rhesus  
28 macaque TRIM5 $\alpha$  (Sawyer et al., 2005) were amplified and cloned into pQCXIP (Takara Bio,  
29 Kusatsu, Shiga, Japan), just upstream of the IRES–puromycin resistance cassette, between the  
30 EcoRI and NotI restriction sites. Targeted TRIM5 $\alpha$  mutations were generated by Quikchange  
31 PCR using primers containing the desired point mutation flanked by 17-25 nucleotides of  
32 homology on each side of the mutation. Primestart polymerase (Takara Bio) was used to  
33 minimize errors during full-plasmid amplification, followed by DpnI digestion of unmodified

1 parent DNA. All plasmids were cloned into high-efficiency chemically competent DH5α (NEB,  
2 Ipswich, MA, USA). Plasmids were purified using PureYield miniprep kits (Promega, Madison,  
3 WI, USA), and coding sequences were verified by complete sequencing. See Table 1 for all  
4 primers used in cloning and sequencing.

5 Deep mutational scanning libraries were generated using degenerate primers to amplify  
6 TRIM5α-HA in pQCXIP using high-fidelity Q5 polymerase (NEB). Degenerate primers contained  
7 a single NNS codon (N = A/T/C/G, S = C/G), which encodes all 20 amino acids with only 1 stop  
8 codon among 32 possibilities. For each of the 11 or 13 codons in the v1 loop of human or  
9 rhesus TRIM5α, respectively, the two halves of TRIM5α were amplified separately with shared  
10 flanking primers and unique internal primers for each codon (Table 1). For the human TRIM5α  
11 library in which R332P was fixed, internal primers matched the R332P variant of TRIM5α and  
12 codon 332 was not randomized. Internal primers encoded NNS at the designated codon flanked  
13 by 17-25 nucleotides of homology on each side; the forward and reverse internal primers shared  
14 17-25 nucleotides of homology to promote hybridization between the N- and C-terminal PCR  
15 fragments. The codon-matched N- and C-terminal fragments were combined and amplified into  
16 a single fragment using the same flanking primers as in the first amplification. PCR products  
17 were gel purified and cloned via Gibson assembly (NEB) into pQCXIP-TRIM5α-HA of the  
18 matching species, which had been digested with NotI and BamHI and gel purified. Gibson  
19 assembly products were transformed into high-efficiency chemically competent DH5α (NEB)  
20 with 30 minutes of heat shock recovery. Serial dilutions were plated to count the number of  
21 unique colonies, and transformations were repeated until at least 100x library coverage was  
22 achieved (human:  $32 \times 11 \times 100 = 3.52 \times 10^4$  colonies; rhesus:  $32 \times 13 \times 100 = 4.16 \times 10^4$   
23 colonies). To ensure library quality, 40 random colonies were sequenced from each library.  
24 Clones were verified to have insert by analytical restriction digest, and the coding sequence was  
25 fully sequenced to ensure that (1) each clone had only 1 mutation, (2) there were no mutations  
26 outside the v1 loop, and (3) the number of sites mutated once, twice, etc. among these 40  
27 clones approximated a Poisson distribution. When libraries met these criteria, colonies were  
28 scraped from all transformation plates and plasmids were directly purified, without further growth  
29 to avoid amplification bias, using NucleoBond Xtra midiprep kits (Takara Bio).

30

### 31 ***Cell lines***

32 HEK-293T/17 (CVCL\_1926) and CRFK (CVCL\_2426) cells were grown on tissue-culture treated  
33 plates in high-glucose and L-glutamine containing DMEM (Thermo Fisher, Waltham, MA, USA)



1 supplemented with 1x penicillin/streptomycin (Thermo Fisher) and 10% fetal bovine serum  
2 (Thermo Fisher). Cell lines were purchased from ATCC (Manassas, VA, USA) and confirmed to  
3 be mycoplasma free by MycoProbe kit (R&D Systems, Minneapolis, MN, USA). Cells were  
4 grown at 37 °C, 5% CO<sub>2</sub> in humidified incubators and passaged by digestion with 0.05% trypsin-  
5 EDTA (Thermo Fisher). Cell counting was performed using a TC20 automated cell counter  
6 (BioRad, Hercules, CA, USA).

7

### 8 ***Virus production, titering, and transduction***

9 HEK-293T/17 were seeded at 5 x 10<sup>5</sup> cells/well in 6-well plates the day prior to transfection.  
10 Transfections were performed with Trans-IT 293T transfection reagent (Thermo Fisher)  
11 according to manufacturer's instructions, using 3 μL reagent per μg DNA. All transfected DNA  
12 was purified using PureYield mini or NucleoBond midi kits to minimize LPS contamination and  
13 quantified by NanoDrop (Thermo Fisher) A260. To produce HIV-1, each well was transfected  
14 with 1 μg of p8.9NdSB, 667 ng of pHIV-ZsGreen, and 333 ng of pMD2.G. N-MLV transfections  
15 contained 1 μg of pQCXIP-eGFP, 667 ng of pCIG3N, and 333 ng of pMD2.G. HIV-2, SIVcpz,  
16 and SIVmac transfections contained 1 μg of pALPS-eGFP, 333 ng of pMD2.G, and 667 ng of  
17 either p8.9NdSB HIV-2 CA, pHIV-Gb2, or pHIV-MAC, respectively. TRIM5α-transducing virus  
18 was produced using 1 μg of the appropriate TRIM5α construct, 600 ng of JK3, 300 ng of L-VSV-  
19 G, and 100 ng of CMV-Tat. After 24 hr, media was replaced with 1 mL of fresh media. Virus was  
20 harvested at 48 hr post-transfection. To harvest, media was pelleted at 500 x g, and  
21 supernatant was removed, aliquoted, and snap frozen in liquid nitrogen. To increase titers for  
22 HIV-2 and N-MLV, and in some cases HIV-1, virus was concentrated prior to freezing. To  
23 concentrate, virus was pelleted through a 20% sucrose cushion at 23,000 rpm (~70,000 x g) for  
24 1 hr at 4 °C. Pellets were air dried for 5 min, and then resuspended in fresh media for 24 hr with  
25 periodic gentle vortexing.

26 All viruses were titered under conditions most closely mimicking their large-scale use.  
27 CRFK cells were seeded at 1 x 10<sup>5</sup> cells/mL the day prior to transduction. Freshly thawed  
28 viruses were serially diluted and replaced cellular media at ½ x volume. No transducing reagent  
29 was used for GFP-marked retroviral VLPs; TRIM5α-transducing VLPs were supplemented with  
30 10 μg/mL polybrene. Plates were centrifuged at 1100 x g for 30 min and then incubated at 37  
31 °C. The following day, virus was removed and cells were fed fresh media, which contained 6  
32 μg/mL puromycin for TRIM5α-transducing VLPs only. For GFP-marked retroviral VLPs,  
33 transduction efficiency was monitored by flow cytometry 72 hr after transduction. For TRIM5α-



1 transducing VLPs, cell survival was monitored daily by estimating cell confluence, until  
2 untransduced cells were completely dead (no surface-adhered cells). Media was replaced with  
3 fresh puromycin-containing media every 2-3 days, and cells were passaged into larger well  
4 format as needed. Multiplicity of infection (MOI) for serial dilutions was estimated by Poisson  
5 distribution; for example, ~63% of cells are expected to be transduced at least once and thus  
6 survive selection with an MOI of 1.

7 To stably transduce TRIM5 $\alpha$ , we chose an MOI of ~0.33 (25-30% survival during titering)  
8 to minimize multiple transductions per cell (< 5% probability). CRFK cells were seeded in 6-well  
9 plates at  $2 \times 10^5$  cells/well the day prior to transduction; for deep mutational scanning libraries,  
10 sufficient cells were seeded to generate at least 500x independent transductions for each  
11 nucleotide variant ( $32 \text{ codons} \times 13 \text{ sites} \times 500 \div 25\% \text{ survival} = 8.3 \times 10^5 \text{ cells}$ ). Cells were  
12 transduced at the appropriate MOI with  $10 \mu\text{g/mL}$  polybrene and spinoculation ( $1100 \times \text{g}$ , 30  
13 min), then underwent  $6 \mu\text{g/mL}$  puromycin selection starting at 24 hr post-transduction and  
14 continuing until untransduced controls were completely dead (usually ~7 days). Upon  
15 completion of selection, surviving cells were pooled and maintained in  $2 \mu\text{g/mL}$  puromycin.  
16 Passages always maintained at least  $5 \times 10^5$  cells (1000x library coverage) to avoid  
17 bottlenecking library diversity.

18

### 19 ***Deep mutational scan, sequencing, and enrichment calculation***

20 CRFK cells expressing a TRIM5 $\alpha$  deep mutational scanning library were seeded in 12-well  
21 plates at  $1 \times 10^5$  cells/well the day prior to viral infection. Sufficient wells were seeded for at  
22 least 1000x library coverage among target cells to be sorted 4 days later (assuming at least 2  
23 doublings in that time, with sorting frequency typically ~5% of cells as estimated beforehand by  
24 viral titering against DMS library-expressing cells). Thus, each biological replicate began with at  
25 least  $2.4 \times 10^6$  cells seeded from the same CRFK library.

26 Libraries were infected with HIV-1-GFP or N-MLV-GFP the following day. For loss-of-  
27 restriction experiments (Figures 4-6), we chose viral doses that were restricted by WT TRIM5 $\alpha$   
28 to < 1%, as determined during preliminary titering experiments. For gain-of-HIV-1-restriction by  
29 human TRIM5 $\alpha$ , we chose a viral dose in which WT TRIM5 $\alpha$  was infected to ~98%, in order to  
30 minimize uninfected GFP-negative cells. Infection efficiency was monitored by parallel infection  
31 of controls (empty vector, WT TRIM5 $\alpha$ , uninfected negative control). Cells were infected by  
32 spinoculation ( $1100 \times \text{g}$ , 30 min) and media was replaced 24 hr post-infection. Infected cells  
33 were incubated an additional 48 hr to increase GFP expression levels. Cells were harvested by

1 trypsinization, pelleted, and vigorously resuspended as well as filtered (0.7  $\mu\text{m}$ ) to minimize  
2 aggregation. Cells were FACS sorted, with stringent gating on size, single cells, and presence  
3 or absence of GFP (for loss- or gain-of-restriction, respectively). At least  $4 \times 10^5$  cells (1000x  
4 library coverage) were sorted for each biological replicate. For gain-of-HIV-1-restriction by  
5 human TRIM5 $\alpha$ , sorted GFP-negative cells were pelleted and re-seeded at  $1 \times 10^5$  cells/well for  
6 a second round of infection, at the same dose, the following day, in order to enrich true  
7 restrictors and deplete cells uninfected by chance. Infection, harvest, and FACS sorting were all  
8 performed identically, except that apparent HIV-1 restriction by pooled variants was improved in  
9 the second round of enrichment (~50% GFP-negative compared to ~10% in the first round of  
10 infection). Sorted cells were pelleted, resuspended in PBS, and genomic DNA was harvested  
11 using Blood & Cell Culture DNA Mini kits (Qiagen, Hilden, Germany). Input samples were  
12 harvested from infected but unsorted cells for each replicate.

13 Illumina libraries were constructed from genomic DNA by 2-step PCR amplification using  
14 Q5 polymerase. The first PCR amplified the v1 loop of TRIM5 $\alpha$  and added adapters; the second  
15 set of PCR primers annealed to these adapters and added a unique 8 bp i7 Nextera barcode as  
16 well as P5 and P7 adapters for flow cell binding (see Table 1). Genomic DNA from each sample  
17 (2 input replicates, 2 sorted replicates for each experiment) was amplified in 3 separate PCR  
18 tubes, with 500 ng of genomic DNA per tube, to offset random PCR jackpotting. This sampled a  
19 total of 1.5  $\mu\text{g}$  of DNA, which represents ~500x library coverage, assuming 6.6 pg gDNA/cell  
20 and a single TRIM5 $\alpha$  integration/cell. After 15 cycles of amplification, samples were digested for  
21 15 min at 37  $^{\circ}\text{C}$  with 5  $\mu\text{L}$  of ExoI (NEB) to remove first round primers. PCR products were then  
22 pooled from triplicate tubes, purified by QIAquick PCR purification kit (Qiagen), and the entire  
23 elution was divided between 3 separate PCR tubes for 18 cycles of second round amplification.  
24 Barcoded PCR products (234 bp) were pooled from triplicate tubes and purified by double-sided  
25 size selection using Ampure beads (Beckman Coulter, Pasadena, CA, USA). In brief, large DNA  
26 was removed by incubation with 0.8x bead volume and magnetization; PCR products were  
27 bound from the supernatant with 1.5x bead volume, washed with 80% ethanol, and eluted in  
28 water. PCR product purity was confirmed by gel electrophoresis. Samples were then pooled at  
29 equimolar ratios and Illumina sequenced (MiSeq-v2) with single-end reads. One read was  
30 generated using the i7 index primer for the 8 bp barcode, and a second read used a custom  
31 sequencing primer, which annealed immediately adjacent to the v1 loop (33 bp read for human,  
32 39 bp for rhesus TRIM5 $\alpha$ ). PhiX was included at 15% in sequencing runs to increase per-bp-

1 diversity, since the majority (10/11 for human or 12/13 for rhesus) of reads should not  
2 randomize any given codon.

3 Reads counts for each unique nucleotide sequence from all 4 samples in an experiment  
4 were compiled into a single tsv file. Sequences that differed from WT by more than 1 codon, or  
5 sequences in which codons did not end in C or G, were filtered from the dataset; these largely  
6 had only a few reads per sample and represented sequencing errors. Reads counts were  
7 normalized to total counts per million (cpm) within each barcoded sample. Sequences with low  
8 read counts (< 50 cpm) were excluded as they were found to introduce noise (poor correlation  
9 between replicates and across codons). Enrichment was calculated as the ratio of sorted to  
10 input cpm. The average and standard deviation of enrichment was calculated across both  
11 replicates of all synonymous codons to determine statistics at the amino acid level, except for  
12 WT variants, where we show each synonymous variant separately (averaged across replicates)  
13 to better visualize WT variance. Amino acid enrichment values were plotted in waterfall plots  
14 (descending order of enrichment), scatter plots (comparing replicates), and double-gradient heat  
15 maps (comparing amino acid variants at each position, with baseline value [white] set to the  
16 average for WT enrichment) using GraphPad Prism. R scripts for data analysis, including all  
17 filtering, normalization, and calculations, as well as raw sequence reads have been uploaded to  
18 Github: [https://github.com/jtenthor/T5DMS\\_data\\_analysis](https://github.com/jtenthor/T5DMS_data_analysis).

19

### 20 ***Calculation of fold virus inhibition***

21 Viral inhibition by TRIM5 $\alpha$  constructs was always compared to CRFK cells transduced with  
22 empty vector. CRFK lines were seeded in 96-well plates at  $1 \times 10^4$  cells/well the day prior to  
23 transduction. Media was removed and replaced with serial 3-fold dilutions of the appropriate  
24 GFP-marked retrovirus. Serial dilutions were started at titers that yielded ~95% infection in  
25 untransduced CRFK. Plates were centrifuged at 1100 x g for 30 min and then incubated at 37  
26 °C. The following day, virus was removed and cells were fed fresh media. Cells were harvested  
27 by trypsinization 72 hr after transduction and analyzed by flow cytometry for GFP fluorescence.  
28 Cells were gated on size (FSC vs. SSC), single cells (FSC height vs. area), and GFP+ as  
29 compared to negative control (FITC vs. PE empty channel).

30 Fold inhibition was calculated by comparing ID<sub>10</sub>, the amount of virus required to infect  
31 10% of cells, between TRIM5 $\alpha$  and empty vector. Infection (% GFP-positive) was plotted  
32 against viral dose, both on logarithmic scale, as in Figure 2E. Infection points < 0.5% or > 50%  
33 GFP-positive were excluded due to increased noise or curve saturation, respectively, yielding a

1 simple linear relationship. A linear regression (against log-transformed data) was then used to  
2 calculate the viral dose corresponding to 10% infection (back-calculated to linear scale), and the  
3 dose for TRIM5 $\alpha$  was divided by that for empty vector. This method was used to calculate fold  
4 inhibition for all viruses except human TRIM5 $\alpha$  against N-MLV, as we could not consistently  
5 achieve infection greater than 1% for WT human TRIM5 $\alpha$ ; we therefore report raw infection  
6 data. All fold inhibition was calculated from at least 3 independent experiments, which were  
7 performed either in biological singlicate or duplicate.

8

### 9 ***Immunoblot***

10 CRFK cells stably expressing TRIM5 $\alpha$ -HA variants were harvested by trypsinization, washed in  
11 PBS, and counted;  $10^6$  cells were lysed for 15 min on ice in 100  $\mu$ L pre-chilled lysis buffer (50  
12 mM Tris, pH 8, 150 mM NaCl, 1% Triton-X100, 1x cOmplete EDTA-free protease inhibitor  
13 cocktail [Roche, Basel, Switzerland]). Lysates were pelleted at 20,000 x g for 15 min at 4 °C.  
14 Supernatants were quantified by Bradford protein assay (BioRad) and normalized to load equal  
15 protein across all samples (usually 10-25  $\mu$ g per lane). Samples were boiled for 5 min in  
16 Laemmli Sample Buffer (BioRad) supplemented with 5%  $\beta$ -mercaptoethanol and loaded onto  
17 Mini-PROTEAN TGX stain-free gels (BioRad). Gels were run in Tris/Glycine/SDS buffer  
18 (BioRad) for 50 min at 150 V, then transferred semi-dry for 7 min at 1.3 mV using Trans-Blot  
19 Turbo 0.2  $\mu$ m nitrocellulose transfer packs and the Trans-Blot Turbo transfer system (BioRad).  
20 Blots were blocked with Odyssey blocking buffer (LI-COR, Lincoln, NE, USA), then probed with  
21 mouse anti-HA at 1:1000 (AB\_2565335, Biolegend, San Diego, CA, USA) and rabbit anti- $\beta$ -  
22 actin at 1:5000 (AB\_2305186, Abcam, Cambridge, UK). All antibodies were diluted in TBST with  
23 5% bovine serum albumin (Sigma Aldrich, St. Louis, MO, USA). Blots were washed in TBST  
24 and probed with IRDye 680RD donkey anti-mouse (AB\_10953628, LI-COR) and IRDye 800CW  
25 donkey anti-rabbit (AB\_621848, LI-COR), both diluted 1:10000. Blots were washed and  
26 scanned at 680 and 800 nm. HA intensities were quantified using ImageJ and normalized to  
27 actin, then compared to WT TRIM5 $\alpha$  to determine relative expression levels.

28

### 29 ***TRIM5 $\alpha$ phylogeny, rapid evolution analysis, and evolutionary accessibility***

30 A tBLASTn search of human TRIM5 $\alpha$  (NP\_149023.2) against primate genomes returned 29  
31 unique simian primate orthologs of TRIM5 $\alpha$ . We excluded New World monkey sequences as  
32 they share a 9-amino acid deletion in the v1 loop. Open reading frames of the following  
33 sequences were translation aligned using MUSCLE: human (*Homo sapiens*, NM\_033034.2),

1 chimpanzee (*Pan troglodytes*, NM\_001012650.1), bonobo (*Pan paniscus*, XM\_003819046.3),  
 2 gorilla (*Gorilla gorilla*, NM\_001279549.1), Sumatran orangutan (*Pongo abelii*,  
 3 NM\_001131070.1), Bornean orangutan (*Pongo pygmaeus*, AY923179.2), white-handed gibbon  
 4 (*Hylobates lar*, AY923180.1), white-cheeked gibbon (*Nomascus leucogenys*,  
 5 NM\_001280113.1), crab-eating macaque (*Macaca fascicularis*, NM\_001283295.1), rhesus  
 6 macaque (*Macaca mulatta*, NM\_001032910.1), olive baboon (*Papio anubis*, NM\_001112632.1),  
 7 collared mangabey (*Cercocebus torquatus*, KP743974.1), sooty mangabey (*Cercocebus atys*,  
 8 NM\_001305964.1), drill (*Mandrillus leucophaeus*, XM\_011971974.1), Wolf's guenon  
 9 (*Cercopithecus wolfi*, KP743973.1), red guenon (*Erythrocebus patas*, AY740619.1), grivet  
 10 (*Cercopithecus aethiops*, AY669399.1), tanzania monkey (*Chlorocebus tantalus*, AY740613.1),  
 11 African green monkey (*Chlorocebus sabaeus*, XM\_008019877.1), vervet monkey (*Chlorocebus*  
 12 *pygerythrus*, AY740612.1), golden snub-nosed monkey (*Rhinopithecus roxellana*,  
 13 XM\_010364548.1), and Angola colobus (*Colobus angolensis*, XM\_011963593.1).

14 A PHYML tree was built using the HKY85 substitution model with 100 bootstraps and  
 15 rooted on human TRIM6 (NM\_001003818.3). The unrooted tree was used for site-specific  
 16 PAML analysis (Z. Yang, 1997) using both F3x4 and F61 codon models to ensure robust  
 17 results. We performed maximum likelihood (ML) tests comparing model 7 (neutral selection beta  
 18 distribution) to model 8 (beta distribution with positive selection allowed). In each case, the  
 19 model allowing positive selection gave the best fit to the data ( $p < 0.0001$ , chi-squared test on  
 20  $2 \times \Delta ML$  with 2 df). Model 8 also identified rapidly evolving sites with a Bayes Empirical Bayes  
 21 posterior probability  $> 0.95$ . We report residues that meet this threshold for rapid evolution  
 22 under both the F3x4 and F61 codon models.

23 Evolutionarily accessible amino acids were defined as 1 nucleotide substitution away  
 24 from the wild-type sequence. For Figure 1B, we determined all amino acids that were accessible  
 25 from any of the 22 aligned sequences, then determined the fraction of these amino acids that  
 26 were represented in our alignment.

27

28 **Table 1.** Primers used in this study.

| Primer                                                                                 | Use                                                                                         | Sequence                             |
|----------------------------------------------------------------------------------------|---------------------------------------------------------------------------------------------|--------------------------------------|
| <b><i>Subcloning TRIM5a constructs (human, human-v1rhesus, rhesus) into pQCXIP</i></b> |                                                                                             |                                      |
| oJT029                                                                                 | Amplify human or rhesus TRIM5 $\alpha$ -HA (Fwd), add<br>NotI site, for cloning into pQCXIP | caagcggccgcgccaccATGGCTTCTGGA<br>ATC |

|                                 |                                                                                                                                                                                        |                                                      |
|---------------------------------|----------------------------------------------------------------------------------------------------------------------------------------------------------------------------------------|------------------------------------------------------|
| oJT030                          | Amplify human or rhesus TRIM5 $\alpha$ -HA (Rev), add EcoRI site, for cloning into pQCXIP                                                                                              | gcggaattcTCAagcgtagctctgggacgtc                      |
| <b>DMS library construction</b> |                                                                                                                                                                                        |                                                      |
| oJT037                          | Flanking primer for all DMS library construction (Fwd), amplifies pQCXIP backbone 5' of NotI site for Gibson cloning with pQCXIP-TRIM5 $\alpha$ digested with NotI and BamHI           | acctgcaggaattgatccgcgcc                              |
| oJT038                          | Flanking primer for rhesus DMS library construction (Rev), amplifies rhesus TRIM5 $\alpha$ 3' of BamHI site for Gibson cloning with pQCXIP-TRIM5 $\alpha$ digested with NotI and BamHI | GGATTGGAAGCCAGCACATACCCC<br>CAG                      |
| oJT003                          | Randomize rhesus TRIM5 $\alpha$ at codon Q332 (Fwd primer, use w/ oJT039 for C-term half)                                                                                              | CGGAACCCACAGATAATGTATNNS<br>GCACCAGGGACATTATTTAC     |
| oJT004                          | Randomize rhesus TRIM5 $\alpha$ at codon Q332 (Rev primer, use w/ oJT037 for N-term half)                                                                                              | GTAAATAATGTCCCTGGTGCSNNAT<br>ACATTATCTGTGGGTTCCG     |
| oJT005                          | Randomize rhesus TRIM5 $\alpha$ at codon A333 (Fwd primer, use w/ oJT038 for C-term half)                                                                                              | GAACCCACAGATAATGTATCAGNNS<br>CCAGGGACATTATTTACGTTTC  |
| oJT006                          | Randomize rhesus TRIM5 $\alpha$ at codon A333 (Rev primer, use w/ oJT037 for N-term half)                                                                                              | GAAACGTAAATAATGTCCCTGGSNN<br>CTGATACATTATCTGTGGGTTTC |
| oJT007                          | Randomize rhesus TRIM5 $\alpha$ at codon P334 (Fwd primer, use w/ oJT038 for C-term half)                                                                                              | CCACAGATAATGTATCAGGCANNS<br>GGGACATTATTTACGTTTCCG    |
| oJT008                          | Randomize rhesus TRIM5 $\alpha$ at codon P334 (Rev primer, use w/ oJT037 for N-term half)                                                                                              | CGGAAACGTAAATAATGTCCCSNNT<br>GCCTGATACATTATCTGTGG    |
| oJT009                          | Randomize rhesus TRIM5 $\alpha$ at codon G335 (Fwd primer, use w/ oJT038 for C-term half)                                                                                              | CAGATAATGTATCAGGCACCANNSA<br>CATTATTTACGTTTCCGTCAC   |
| oJT010                          | Randomize rhesus TRIM5 $\alpha$ at codon G335 (Rev primer, use w/ oJT037 for N-term half)                                                                                              | GTGACGGAAACGTAAATAATGTSNN<br>TGGTGCCTGATACATTATCTG   |
| oJT011                          | Randomize rhesus TRIM5 $\alpha$ at codon T336 (Fwd primer, use w/ oJT038 for C-term half)                                                                                              | ATGTATCAGGCACCAGGGNNSTTAT<br>TTACGTTTCCGTCACTCAC     |
| oJT012                          | Randomize rhesus TRIM5 $\alpha$ at codon T336 (Rev primer, use w/ oJT037 for N-term half)                                                                                              | GTGAGTGACGGAAACGTAAATAAS<br>NNCCCTGGTGCCTGATACAT     |
| oJT013                          | Randomize rhesus TRIM5 $\alpha$ at codon L337 (Fwd primer, use w/ oJT038 for C-term half)                                                                                              | TATCAGGCACCAGGGACANNSTTTA<br>CGTTTCCGTCACTCAC        |
| oJT014                          | Randomize rhesus TRIM5 $\alpha$ at codon L337 (Rev primer, use w/ oJT037 for N-term half)                                                                                              | GTGAGTGACGGAAACGTAAASNNT<br>GTCCCTGGTGCCTGATA        |



|        |                                                                                                                                                           |                                                            |
|--------|-----------------------------------------------------------------------------------------------------------------------------------------------------------|------------------------------------------------------------|
| oJT015 | Randomize rhesus TRIM5α at codon F338 (Fwd primer, use w/ oJT038 for C-term half)                                                                         | CAGGCACCAGGGACATTANNSACG<br>TTTCCGTCACCTCACG               |
| oJT016 | Randomize rhesus TRIM5α at codon F338 (Rev primer, use w/ oJT037 for N-term half)                                                                         | CGTGAGTGACGGAAACGTSNNTAA<br>TGTCCCTGGTGCCTG                |
| oJT017 | Randomize rhesus TRIM5α at codon T339 (Fwd primer, use w/ oJT038 for C-term half)                                                                         | AGGCACCAGGGACATTATTTNNSTT<br>TCCGTCACCTCACGAATTTTC         |
| oJT018 | Randomize rhesus TRIM5α at codon T339 (Rev primer, use w/ oJT037 for N-term half)                                                                         | GAAATTCGTGAGTGACGGAAASNN<br>AAATAATGTCCCTGGTGCCT           |
| oJT019 | Randomize rhesus TRIM5α at codon F340 (Fwd primer, use w/ oJT038 for C-term half)                                                                         | CACCAGGGACATTATTTACGNNSCC<br>GTCACCTCACGAATTTCAAT          |
| oJT020 | Randomize rhesus TRIM5α at codon F340 (Rev primer, use w/ oJT037 for N-term half)                                                                         | ATTGAAATTCGTGAGTGACGGSNN<br>CGTAAATAATGTCCCTGGTG           |
| oJT021 | Randomize rhesus TRIM5α at codon P341 (Fwd primer, use w/ oJT038 for C-term half)                                                                         | ACCAGGGACATTATTTACGTTTNS<br>TCACTCACGAATTTCAATTATTGTA      |
| oJT022 | Randomize rhesus TRIM5α at codon P341 (Rev primer, use w/ oJT037 for N-term half)                                                                         | TACAATAATTGAAATTCGTGAGTGA<br>SNNAACGTAAATAATGTCCCTGGT      |
| oJT023 | Randomize rhesus TRIM5α at codon S342 (Fwd primer, use w/ oJT038 for C-term half)                                                                         | GGGACATTATTTACGTTTCCGNNSC<br>TCACGAATTTCAATTATTGTACT       |
| oJT024 | Randomize rhesus TRIM5α at codon S342 (Rev primer, use w/ oJT037 for N-term half)                                                                         | AGTACAATAATTGAAATTCGTGAGS<br>NCGGAAACGTAAATAATGTCCC        |
| oJT025 | Randomize rhesus TRIM5α at codon L343 (Fwd primer, use w/ oJT038 for C-term half)                                                                         | GACATTATTTACGTTTCCGTCANNS<br>ACGAATTTCAATTATTGTACTGGC      |
| oJT026 | Randomize rhesus TRIM5α at codon L343 (Rev primer, use w/ oJT037 for N-term half)                                                                         | GCCAGTACAATAATTGAAATTCGTS<br>NNTGACGGAAACGTAAATAATGTC      |
| oJT027 | Randomize rhesus TRIM5α at codon T344 (Fwd primer, use w/ oJT038 for C-term half)                                                                         | CATTATTTACGTTTCCGTCACCTCNN<br>SAATTTCAATTATTGTACTGGCGTC    |
| oJT028 | Randomize rhesus TRIM5α at codon T344 (Rev primer, use w/ oJT037 for N-term half)                                                                         | GACGCCAGTACAATAATTGAAATTS<br>NNGAGTGACGGAAACGTAAATAAT<br>G |
| oAS024 | Flanking primer for human DMS libraries (Rev), amplifies human TRIM5α 3' of BamHI site for Gibson cloning with pQCXIP-TRIM5α digested with NotI and BamHI | AGCACATACCCCCAGGATCCAAGC<br>AG                             |
| oAS002 | Amplify N-term half of human TRIM5α (WT or R332P) before codon G330, to hybridize w/                                                                      | ATATATTATCTGTGGTTTCGGAGAG<br>C                             |



|        |                                                                                                                                              |                                                                     |
|--------|----------------------------------------------------------------------------------------------------------------------------------------------|---------------------------------------------------------------------|
|        | randomized G330 C-term half (Rev primer, use w/ oJT037)                                                                                      |                                                                     |
| oAS001 | Randomize human TRIM5α (WT) at codon G330 (Fwd primer, use w/ oAS024 for C-term half)                                                        | GCTCTCCGAAACCACAGATAATATA<br><b>TNNSGCACGAGGGACAAGATACC</b>         |
| oJT142 | Randomize human TRIM5α (R332P) at codon G330 (Fwd primer, use w/ oAS024 for C-term half)                                                     | GCTCTCCGAAACCACAGATAATATA<br>TnnsGCACcAGGGACAAGATACCA               |
| oAS004 | Amplify N-term half of human TRIM5α (WT or R332P) before codon A331, to hybridize w/ randomized A331 C-term half (Rev primer, use w/ oJT037) | CCCATATATTATCTGTGGTTTCGG                                            |
| oAS003 | Randomize human TRIM5α (WT) at codon A331 (Fwd primer, use w/ oAS024 for C-term half)                                                        | CCGAAACCACAGATAATATATGGGN<br><b>N</b> SCGAGGGACAAGATACCAGA          |
| oJT143 | Randomize human TRIM5α (R332P) at codon A331 (Fwd primer, use w/ oAS024 for C-term half)                                                     | CCGAAACCACAGATAATATATGGGn<br>nsCcAGGGACAAGATACCAGAC                 |
| oAS006 | Amplify N-term half of human TRIM5α (WT) before codon R332 to hybridize w/ randomized R332 C-term half (Rev primer, use w/ oJT037)           | TGCCCCATATATTATCTGTGGTTTC                                           |
| oAS005 | Randomize human TRIM5α (WT) at codon R332 (Fwd primer, use w/ oAS024 for C-term half)                                                        | GAAACCACAGATAATATATGGGGCA<br><b>NNS</b> GGGACAAGATACCAGACATTT<br>G  |
| oAS008 | Amplify N-term half of human TRIM5α (WT) before codon G333 to hybridize w/ randomized G333 C-term half (Rev primer, use w/ oJT037)           | TCGTGCCCCATATATTATCTGTG                                             |
| oAS007 | Randomize human TRIM5α (WT) at codon G333 (Fwd primer, use w/ oAS024 for C-term half)                                                        | CACAGATAATATATGGGGCACGAN<br><b>NS</b> ACAAGATACCAGACATTTGTGAA<br>TT |
| oJT144 | Amplify N-term half of human TRIM5α (R332P) before codon G333 to hybridize w/ randomized G333 C-term half (Rev primer, use w/ oJT037)        | TgGTGCCCCATATATTATCTGTG                                             |
| oJT145 | Randomize human TRIM5α (R332P) at codon G333 (Fwd primer, use w/ oAS024 for C-term half)                                                     | CACAGATAATATATGGGGCACcAnns<br>ACAAGATACCAGACATTTGTGAATT<br>TC       |

|        |                                                                                                                                       |                                                                   |
|--------|---------------------------------------------------------------------------------------------------------------------------------------|-------------------------------------------------------------------|
| oAS010 | Amplify N-term half of human TRIM5α (WT) before codon T334 to hybridize w/ randomized T334 C-term half (Rev primer, use w/ oJT037)    | CCCTCGTGCCCCATATATTA                                              |
| oAS009 | Randomize human TRIM5α (WT) at codon T334 (Fwd primer, use w/ oAS024 for C-term half)                                                 | TAATATATGGGGCACGAGGGNNSA<br>GATACCAGACATTTGTGAATTTCA              |
| oJT146 | Amplify N-term half of human TRIM5α (R332P) before codon T334 to hybridize w/ randomized T334 C-term half (Rev primer, use w/ oJT037) | CCCTgGTGCCCCATATATTATCTG                                          |
| oJT147 | Randomize human TRIM5α (R332P) at codon T334 (Fwd primer, use w/ oAS024 for C-term half)                                              | CAGATAATATATGGGGCACcAGGGn<br>nsAGATACCAGACATTTGTGAATTTCA<br>AATTA |
| oAS012 | Amplify N-term half of human TRIM5α (WT) before codon R335 to hybridize w/ randomized R335 C-term half (Rev primer, use w/ oJT037)    | TGTCCCTCGTGCCCCAT                                                 |
| oAS011 | Randomize human TRIM5α (WT) at codon R335 (Fwd primer, use w/ oAS024 for C-term half)                                                 | ATggggcacgagggacaNNStaccagacatt<br>gtgAATTTCAATTATTG              |
| oJT148 | Amplify N-term half of human TRIM5α (R332P) before codon R335 to hybridize w/ randomized R335 C-term half (Rev primer, use w/ oJT037) | TGTCCCTgGTGCCCCATATA                                              |
| oJT149 | Randomize human TRIM5α (R332P) at codon R335 (Fwd primer, use w/ oAS024 for C-term half)                                              | TATATGGGGCACcAGGGACAnnsTA<br>CCAGACATTTGTGAATTTCAATTATT<br>G      |
| oAS014 | Amplify N-term half of human TRIM5α (WT) before codon Y336 to hybridize w/ randomized Y336 C-term half (Rev primer, use w/ oJT037)    | TCTTGTCCCTCGTGCCC                                                 |
| oAS013 | Randomize human TRIM5α (WT) at codon Y336 (Fwd primer, use w/ oAS024 for C-term half)                                                 | GGGCACGAGGGACAAGANNNSCAGA<br>CATTTGTGAATTTCAATTATTG               |
| oJT150 | Amplify N-term half of human TRIM5α (R332P) before codon Y336 to hybridize w/ randomized Y336 C-term half (Rev primer, use w/ oJT037) | TCTTGTCCCTgGTGCCCC                                                |
| oJT151 | Randomize human TRIM5α (R332P) at codon Y336 (Fwd primer, use w/ oAS024 for C-term half)                                              | GGGGCACcAGGGACAAGAnnsCAGA<br>CATTTGTGAATTTCAATTATTGTAC            |
| oAS016 | Amplify N-term half of human TRIM5α (WT) before codon Q337 to hybridize w/ randomized Q337 C-term half (Rev primer, use w/ oJT037)    | GTATCTTGTCCCTCGTGCC                                               |

|        |                                                                                                                                             |                                                                         |
|--------|---------------------------------------------------------------------------------------------------------------------------------------------|-------------------------------------------------------------------------|
| oAS015 | Randomize human TRIM5α (WT) at codon Q337<br>(Fwd primer, use w/ oAS024 for C-term half)                                                    | GCACGAGGGACAAGATAC <b>NNS</b> SACA<br>TTTGTGAATTTCAATTATTGTA <b>CTG</b> |
| oJT152 | Amplify N-term half of human TRIM5α (R332P)<br>before codon Q337 to hybridize w/ randomized<br>Q337 C-term half (Rev primer, use w/ oJT037) | GTATCTTGTCCCTgGTGCC                                                     |
| oJT153 | Randomize human TRIM5α (R332P) at codon<br>Q337 (Fwd primer, use w/ oAS024 for C-term<br>half)                                              | GGCACcAGGGACAAGATACnnsACA<br>TTTGTGAATTTCAATTATTGTA <b>CTGG</b>         |
| oAS018 | Amplify N-term half of human TRIM5α (WT)<br>before codon T338 to hybridize w/ randomized<br>T338 C-term half (Rev primer, use w/ oJT037)    | CTGGTATCTTGTCCCTCGTG                                                    |
| oAS017 | Randomize human TRIM5α (WT) at codon T338<br>(Fwd primer, use w/ oAS024 for C-term half)                                                    | CACGAGGGACAAGATACCAG <b>NNST</b><br>TTGTGAATTTCAATTATTGTA <b>CTGG</b>   |
| oJT154 | Amplify N-term half of human TRIM5α (R332P)<br>before codon T338 to hybridize w/ randomized<br>T338 C-term half (Rev primer, use w/ oJT037) | CTGGTATCTTGTCCCTgGTG                                                    |
| oJT155 | Randomize human TRIM5α (R332P) at codon<br>T338 (Fwd primer, use w/ oAS024 for C-term half)                                                 | CACcAGGGACAAGATACCAGnnsTT<br>TGTGAATTTCAATTATTGTA <b>CTGGC</b><br>AT    |
| oAS020 | Amplify N-term half of human TRIM5α (WT)<br>before codon F339 to hybridize w/ randomized<br>F339 C-term half (Rev primer, use w/ oJT037)    | TGTCTGGTATCTTGTCCCTC                                                    |
| oAS019 | Randomize human TRIM5α (WT) at codon F339<br>(Fwd primer, use w/ oAS024 for C-term half)                                                    | GAGGGACAAGATACCAGAC <b>NNSG</b><br>TGAATTTCAATTATTGTA <b>CTGGC</b>      |
| oJT156 | Amplify N-term half of human TRIM5α (R332P)<br>before codon F339 to hybridize w/ randomized<br>F339 C-term half (Rev primer, use w/ oJT037) | TGTCTGGTATCTTGTCCCTgG                                                   |
| oJT157 | Randomize human TRIM5α (R332P) at codon<br>F339 (Fwd primer, use w/ oAS024 for C-term half)                                                 | CcAGGGACAAGATACCAGACAnnsG<br>TGAATTTCAATTATTGTA <b>CTGGCAT</b><br>C     |
| oAS022 | Amplify N-term half of human TRIM5α (WT)<br>before codon V340 to hybridize w/ randomized<br>V340 C-term half (Rev primer, use w/ oJT037)    | AAATGTCTGGTATCTTGTCCCTC                                                 |
| oAS021 | Randomize human TRIM5α (WT) at codon V340<br>(Fwd primer, use w/ oAS024 for C-term half)                                                    | AGGGACAAGATACCAGACATTT <b>NNS</b><br>AATTTCAATTATTGTA <b>CTGGCATCC</b>  |

|                                             |                                                                                                                                       |                                                                            |
|---------------------------------------------|---------------------------------------------------------------------------------------------------------------------------------------|----------------------------------------------------------------------------|
| oJT158                                      | Amplify N-term half of human TRIM5α (R332P) before codon V340 to hybridize w/ randomized V340 C-term half (Rev primer, use w/ oJT037) | AAATGTCTGGTATCTTGTCCCTg                                                    |
| oJT159                                      | Randomize human TRIM5α (R332P) at codon V340 (Fwd primer, use w/ oAS024 for C-term half)                                              | cAGGGACAAGATACCAGACATTTnns<br>AATTTCAATTATTGTACTGGCCTCCT<br>G              |
| <b><i>Illumina library construction</i></b> |                                                                                                                                       |                                                                            |
| oJT055                                      | Illumina library construction, PCR1 Fwd primer (rhesus TRIM5α only), amplifies v1 loop and adds adaptor                               | tcgtcggcagcgtcagatgtgtataagagacagT<br>GAGCTCTCGGAACCCACAGATAAT<br>GTAT     |
| oJT056                                      | Illumina library construction, PCR1 Rev primer (rhesus TRIM5α only), amplifies v1 loop and adds adaptor                               | gtctcgtgggctcggagatgtgtataagagacagG<br>CCCAGGACGCCAGTACAATAATTG<br>AAATT   |
| oJT113                                      | Illumina library construction, PCR1 Fwd primer (human TRIM5α libraries) amplifies v1 loop and adds adaptor                            | tcgtcggcagcgtcagatgtgtataagagacagC<br>AAGTGAGCTCTCCGAAACCACAGA<br>TAATATAT |
| oJT114                                      | Illumina library construction, PCR1 Rev primer (human TRIM5α libraries), amplifies v1 loop and adds adaptor                           | gtctcgtgggctcggagatgtgtataagagacagG<br>AGCCCAGGATGCCAGTACAATAATT<br>GAAATT |
| oJT057                                      | Illumina library construction, PCR2 Fwd primer (all libraries), adds P5 adaptor                                                       | AATGATACGGCGACCACCGAGATC<br>TACACtagatcgcTCGTGGCAGCGTC                     |
| oJT058                                      | Illumina library construction, PCR2 Rev primer (all libraries), adds P7 adaptor and N701 barcode                                      | CAAGCAGAAGACGGCATAACGAGATt<br>cgccttaGTCTCGTGGGCTCGG                       |
| oJT059                                      | Illumina library construction, PCR2 Rev primer (all libraries), adds P7 adaptor and N702 barcode                                      | CAAGCAGAAGACGGCATAACGAGAT<br>ctagtacgGTCTCGTGGGCTCGG                       |
| oJT060                                      | Illumina library construction, PCR2 Rev primer (all libraries), adds P7 adaptor and N703 barcode                                      | CAAGCAGAAGACGGCATAACGAGATt<br>tctgcctGTCTCGTGGGCTCGG                       |
| oJT115                                      | Illumina library construction, PCR2 Rev primer (all libraries), adds P7 adaptor and N704 barcode                                      | CAAGCAGAAGACGGCATAACGAGAT<br>gctcaggaGTCTCGTGGGCTCGG                       |
| oJT116                                      | Illumina library construction, PCR2 Rev primer (all libraries), adds P7 adaptor and N705 barcode                                      | CAAGCAGAAGACGGCATAACGAGAT<br>aggagtccGTCTCGTGGGCTCGG                       |
| oJT117                                      | Illumina library construction, PCR2 Rev primer (all libraries), adds P7 adaptor and N706 barcode                                      | CAAGCAGAAGACGGCATAACGAGAT<br>catgcctaGTCTCGTGGGCTCGG                       |
| oJT118                                      | Illumina library construction, PCR2 Rev primer (all libraries), adds P7 adaptor and N707 barcode                                      | CAAGCAGAAGACGGCATAACGAGAT<br>gtagagagGTCTCGTGGGCTCGG                       |

|        |                                                                                                   |                                                             |
|--------|---------------------------------------------------------------------------------------------------|-------------------------------------------------------------|
| oJT119 | Illumina library construction, PCR2 Rev primer (all libraries), adds P7 adaptor and N708 barcoode | CAAGCAGAAGACGGCATAACGAGAT<br>cctctctgGTCTCGTGGGCTCGG        |
| oJT138 | Illumina library construction, PCR2 Rev primer (all libraries), adds P7 adaptor and N709 barcoode | CAAGCAGAAGACGGCATAACGAGAT<br>agcgtagcGTCTCGTGGGCTCGG        |
| oJT139 | Illumina library construction, PCR2 Rev primer (all libraries), adds P7 adaptor and N710 barcoode | CAAGCAGAAGACGGCATAACGAGAT<br>cagcctcgGTCTCGTGGGCTCGG        |
| oJT140 | Illumina library construction, PCR2 Rev primer (all libraries), adds P7 adaptor and N711 barcoode | CAAGCAGAAGACGGCATAACGAGATt<br>gcctcttGTCTCGTGGGCTCGG        |
| oJT141 | Illumina library construction, PCR2 Rev primer (all libraries), adds P7 adaptor and N712 barcoode | CAAGCAGAAGACGGCATAACGAGATt<br>cctctacGTCTCGTGGGCTCGG        |
| oJT166 | Illumina library construction, PCR2 Rev primer (all libraries), adds P7 adaptor and N714 barcoode | CAAGCAGAAGACGGCATAACGAGAT<br><u>TCATGAGCGTCTCGTGGGCTCGG</u> |
| oJT167 | Illumina library construction, PCR2 Rev primer (all libraries), adds P7 adaptor and N715 barcoode | CAAGCAGAAGACGGCATAACGAGAT<br><u>CCTGAGATGTCTCGTGGGCTCGG</u> |
| oJT168 | Illumina library construction, PCR2 Rev primer (all libraries), adds P7 adaptor and N716 barcoode | CAAGCAGAAGACGGCATAACGAGAT<br><u>TAGCGAGTGTCTCGTGGGCTCGG</u> |
| oJT169 | Illumina library construction, PCR2 Rev primer (all libraries), adds P7 adaptor and N718 barcoode | CAAGCAGAAGACGGCATAACGAGAT<br><u>GTAGCTCCGTCTCGTGGGCTCGG</u> |
| oJT170 | Illumina library construction, PCR2 Rev primer (all libraries), adds P7 adaptor and N719 barcoode | CAAGCAGAAGACGGCATAACGAGAT<br><u>TACTACGCGTCTCGTGGGCTCGG</u> |
| oJT171 | Illumina library construction, PCR2 Rev primer (all libraries), adds P7 adaptor and N720 barcoode | CAAGCAGAAGACGGCATAACGAGAT<br><u>AGGCTCCGGTCTCGTGGGCTCGG</u> |
| oJT172 | Illumina library construction, PCR2 Rev primer (all libraries), adds P7 adaptor and N721 barcoode | CAAGCAGAAGACGGCATAACGAGAT<br><u>GCAGCGTAGTCTCGTGGGCTCGG</u> |
| oJT173 | Illumina library construction, PCR2 Rev primer (all libraries), adds P7 adaptor and N722 barcoode | CAAGCAGAAGACGGCATAACGAGAT<br><u>CTGCGCATGTCTCGTGGGCTCGG</u> |
| oJT174 | Illumina library construction, PCR2 Rev primer (all libraries), adds P7 adaptor and N723 barcoode | CAAGCAGAAGACGGCATAACGAGAT<br><u>GAGCGCTAGTCTCGTGGGCTCGG</u> |
| oJT175 | Illumina library construction, PCR2 Rev primer (all libraries), adds P7 adaptor and N724 barcoode | CAAGCAGAAGACGGCATAACGAGAT<br><u>CGCTCAGTGTCTCGTGGGCTCGG</u> |
| oJT176 | Illumina library construction, PCR2 Rev primer (all libraries), adds P7 adaptor and N726 barcoode | CAAGCAGAAGACGGCATAACGAGAT<br><u>GTCTTAGGGTCTCGTGGGCTCGG</u> |
| oJT177 | Illumina library construction, PCR2 Rev primer (all libraries), adds P7 adaptor and N727 barcoode | CAAGCAGAAGACGGCATAACGAGAT<br><u>ACTGATCGGTCTCGTGGGCTCGG</u> |

|                                                |                                                                                                           |                                                             |
|------------------------------------------------|-----------------------------------------------------------------------------------------------------------|-------------------------------------------------------------|
| oJT178                                         | Illumina library construction, PCR2 Rev primer (all libraries), adds P7 adaptor and N728 barcode          | CAAGCAGAAGACGGCATAACGAGAT<br><u>TAGCTGCAGTCTCGTGGGCTCGG</u> |
| oJT179                                         | Illumina library construction, PCR2 Rev primer (all libraries), adds P7 adaptor and N729 barcode          | CAAGCAGAAGACGGCATAACGAGAT<br><u>GACGTGAGTCTCGTGGGCTCGG</u>  |
| RhT5-Illumina F                                | Custom sequencing primer for rhesus TRIM5α<br>Illumina libraries, sequences rhesus TRIM5α v1 loop (39 nt) | TGAGCTCTCGGAACCCACAGATAAT<br>GTAT                           |
| HsT5-Illumina F                                | Custom sequencing primer for human TRIM5α<br>Illumina libraries, sequences human TRIM5α v1 loop (33 nt)   | CAAGTGAGCTCTCCGAAACCACAG<br>ATAATATAT                       |
| <b>Quikchange PCR for targeted mutagenesis</b> |                                                                                                           |                                                             |
| oCY001                                         | Generate G330E mutation in human TRIM5α<br>(Fwd primer, amplify full plasmid with oCY002)                 | CTCCGAAACCACAGATAATATATGa<br>GGCACGAGGGACAAGATAC            |
| oCY002                                         | Generate G330E mutation in human TRIM5α<br>(Rev primer, amplify full plasmid with oCY001)                 | GTATCTTGTCCCTCGTGCCtCATATA<br>TTATCTGTGGTTTCGGAG            |
| oCY003                                         | Generate A331E mutation in human TRIM5α<br>(Fwd primer, amplify full plasmid with oCY004)                 | GAAACCACAGATAATATATGGGGgA<br>CGAGGGACAAGATACCAG             |
| oCY004                                         | Generate A331E mutation in human TRIM5α (Rev primer, amplify full plasmid with oCY003)                    | CTGGTATCTTGTCCCTCGTtCCCCA<br>TATATTATCTGTGGTTTC             |
| oCY005                                         | Generate R332E mutation in human TRIM5α<br>(Fwd primer, amplify full plasmid with oCY006)                 | ACCACAGATAATATATGGGGCgA<br>GGGACAAGATACCAGACATT             |
| oCY006                                         | Generate R332E mutation in human TRIM5α (Rev primer, amplify full plasmid with oCY005)                    | AATGTCTGGTATCTTGTCCCTtGCG<br>CCCATATATTATCTGTGGT            |
| oJT040                                         | Generate R332P mutation in human TRIM5α<br>(Fwd primer, amplify full plasmid with oJT041)                 | CCACAGATAATATATGGGGCgCg<br>GGACAAGATACCAGACATTTG            |
| oJT041                                         | Generate R332P mutation in human TRIM5α (Rev primer, amplify full plasmid with oJT040)                    | CAAATGTCTGGTATCTTGTCCCTgG<br>TGCCCCATATATTATCTGTGG          |
| oCY007                                         | Generate G333Y mutation in human TRIM5α<br>(Fwd primer, amplify full plasmid with oCY008)                 | CACAGATAATATATGGGGCgCgAtac<br>ACAAGATACCAGACATTTGTGAATT     |
| oCY008                                         | Generate G333Y mutation in human TRIM5α<br>(Rev primer, amplify full plasmid with oCY007)                 | AATTCACAAATGTCTGGTATCTTGTg<br>taTCGTGCCCCATATATTATCTGTG     |
| oCY009                                         | Generate G333D mutation in human TRIM5α<br>(Fwd primer, amplify full plasmid with oCY010)                 | CAGATAATATATGGGGCgCgGAta<br>CAAGATACCAGACATTTGTGAATTT<br>C  |

|                |                                                                                                   |                                                         |
|----------------|---------------------------------------------------------------------------------------------------|---------------------------------------------------------|
| oCY010         | Generate G333D mutation in human TRIM5α<br>(Rev primer, amplify full plasmid with oCY009)         | GAAATTCACAAATGTCTGGTATCTT<br>GTatCTCGTGCCCCATATATTATCTG |
| oCY011         | Generate T334D mutation in human TRIM5α<br>(Fwd primer, amplify full plasmid with oCY012)         | GATAATATATGGGGCACGAGGGgac<br>AGATACCAGACATTTGTGAATTTTC  |
| oCY012         | Generate T334D mutation in human TRIM5α (Rev<br>primer, amplify full plasmid with oCY011)         | GAAATTCACAAATGTCTGGTATCTgt<br>cCCCTCGTGCCCCATATATTATC   |
| oJT246         | Generate R335A mutation in human TRIM5α<br>(Fwd primer, amplify full plasmid with oJT247)         | TATGGGGCACGAGGGACAgcATAC<br>CAGACATTTGTGAATTTCAATTATTG  |
| oJT247         | Generate R335A mutation in human TRIM5α (Rev<br>primer, amplify full plasmid with oJT246)         | CAATAATTGAAATTCACAAATGTCT<br>GGTATgcTGTCCCTCGTGCCCCATA  |
| oCY013         | Generate R335E mutation in human TRIM5α<br>(Fwd primer, amplify full plasmid with oCY014)         | TGGGGCACGAGGGACAgAATACCA<br>GACATTTGTGAATTTCAATTATTG    |
| oCY014         | Generate R335E mutation in human TRIM5α (Rev<br>primer, amplify full plasmid with oCY013)         | CAATAATTGAAATTCACAAATGTCT<br>GGTATtcTGTCCCTCGTGCCCCA    |
| oCY015         | Generate Y336E mutation in human TRIM5α<br>(Fwd primer, amplify full plasmid with oCY016)         | GGGCACGAGGGACAAGAgAaCAGA<br>CATTGTGAATTTCAATTATTGTAC    |
| oCY016         | Generate Y336E mutation in human TRIM5α (Rev<br>primer, amplify full plasmid with oCY015)         | GTACAATAATTGAAATTCACAAATG<br>TCTGtTcTCTTGTCCCTCGTGCCC   |
| oCY017         | Generate Q337D mutation in human TRIM5α<br>(Fwd primer, amplify full plasmid with oCY018)         | GGCACGAGGGACAAGATACgAtACA<br>TTTGTGAATTTCAATTATTGTACTG  |
| oCY018         | Generate Q337D mutation in human TRIM5α<br>(Rev primer, amplify full plasmid with oCY017)         | CAGTACAATAATTGAAATTCACAAA<br>TGTaTcGTATCTTGTCCCTCGTGCC  |
| oAS201<br>9-05 | Generate Q337N mutation in human TRIM5α<br>(Fwd primer, amplify full plasmid with oAS2019-<br>06) | GGCACGAGGGACAAGATACaacACA<br>TTTGTGAATTTCAATTATTGTACTGG |
| oAS201<br>9-06 | Generate Q337N mutation in human TRIM5α<br>(Rev primer, amplify full plasmid with oAS2019-<br>05) | CCAGTACAATAATTGAAATTCACAA<br>ATGTgttGTATCTTGTCCCTCGTGCC |
| oCY019         | Generate T338E mutation in human TRIM5α (Fwd<br>primer, amplify full plasmid with oCY020)         | ACGAGGGACAAGATACCAGgaATTT<br>GTGAATTTCAATTATTGTACTGGC   |
| oCY020         | Generate T338E mutation in human TRIM5α (Rev<br>primer, amplify full plasmid with oCY019)         | GCCAGTACAATAATTGAAATTCACA<br>AATtcCTGGTATCTTGTCCCTCGT   |
| oCY021         | Generate F339E mutation in human TRIM5α (Fwd<br>primer, amplify full plasmid with oCY022)         | GAGGGACAAGATACCAGACAgaaGT<br>GAATTTCAATTATTGTACTGGCA    |



|                |                                                                                                         |                                                                 |
|----------------|---------------------------------------------------------------------------------------------------------|-----------------------------------------------------------------|
| oCY022         | Generate F339E mutation in human TRIM5α (Rev primer, amplify full plasmid with oCY021)                  | TGCCAGTACAATAATTGAAATTCACt<br>tcTGTCTGGTATCTTGTCCCTC            |
| oCY023         | Generate V340E mutation in human TRIM5α (Fwd primer, amplify full plasmid with oCY024)                  | GGGACAAGATACCAGACATTTGaGA<br>ATTTCAATTATTGTACTIONGGCATCC        |
| oCY024         | Generate V340E mutation in human TRIM5α (Rev primer, amplify full plasmid with oCY023)                  | GGATGCCAGTACAATAATTGAAATT<br>CtCAAATGTCTGGTATCTTGTCCC           |
| oAS201<br>9-07 | Generate V340H mutation in human TRIM5α (Fwd primer, amplify full plasmid with oAS2019-08)              | GAGGGACAAGATACCAGACATTTca<br>cAATTTCAATTATTGTACTIONGGCATCC<br>T |
| oAS201<br>9-08 | Generate V340H mutation in human TRIM5α (Rev primer, amplify full plasmid with oAS2019-07)              | AGGATGCCAGTACAATAATTGAAAT<br>TgtgAAATGTCTGGTATCTTGTCCCT<br>C    |
| oJT162         | Generate V340stop mutation in human TRIM5α (Fwd primer, amplify full plasmid with oJT163)               | GAGGGACAAGATACCAGACATTTta<br>GAATTTCAATTATTGTACTIONGGCATC<br>C  |
| oJT163         | Generate V340stop mutation in human TRIM5α (Rev primer, amplify full plasmid with oJT162)               | GGATGCCAGTACAATAATTGAAATT<br>CtaAAATGTCTGGTATCTTGTCCCTC         |
| oJT248         | Generate R335A double mutation in human TRIM5α-R332P (Fwd primer, amplify full plasmid with oJT249)     | TATGGGGCACcAGGGACAgcATACC<br>AGACATTTGTGAATTTCAATTATTG          |
| oJT249         | Generate R335A double mutation in human TRIM5α-R332P (Rev primer, amplify full plasmid with oJT248)     | CAATAATTGAAATTCACAAATGTCT<br>GGTATgcTGTCCCTgGTGCCCCATA          |
| oAS201<br>9-03 | Generate R335E double mutation in human TRIM5α-R332P (Fwd primer, amplify full plasmid with oAS2019-04) | TGGGGCACcAGGGACAgaaTACCAG<br>ACATTTGTGAATTTCAATTATTG            |
| oAS201<br>9-04 | Generate R335E double mutation in human TRIM5α-R332P (Rev primer, amplify full plasmid with oAS2019-03) | CAATAATTGAAATTCACAAATGTCT<br>GGTAttcTGTCCCTgGTGCCCCA            |
| oAS201<br>9-01 | Generate Q337D double mutation in human TRIM5α-R332P (Fwd primer, amplify full plasmid with oAS2019-02) | GGCACcAGGGACAAGATACgacACA<br>TTTGTGAATTTCAATTATTGTACTIONGG      |
| oAS201<br>9-02 | Generate Q337D double mutation in human TRIM5α-R332P (Rev primer, amplify full plasmid with oAS2019-01) | CCAGTACAATAATTGAAATTCACAA<br>ATGTgtcGTATCTTGTCCCTgGTGCC         |

|                |                                                                                                                  |                                                         |
|----------------|------------------------------------------------------------------------------------------------------------------|---------------------------------------------------------|
| oAS201<br>9-09 | Generate Q337N double mutation in human TRIM5 $\alpha$ -R332P (Fwd primer, amplify full plasmid with oAS2019-10) | GGCACcAGGGACAAGATACaacACA<br>TTTGTGAATTTCAATTATTGTACTGG |
| oAS201<br>9-10 | Generate Q337N double mutation in human TRIM5 $\alpha$ -R332P (Rev primer, amplify full plasmid with oAS2019-09) | CCAGTACAATAATTGAAATTCACAA<br>ATGTgttGTATCTTGTCCCTgGTGCC |
| oJT122         | Generate Q332E mutation in rhesus TRIM5 $\alpha$ (Fwd primer, amplify full plasmid with oJT123)                  | CTCGGAACCCACAGATAATGTATgA<br>GGCACCAGGGACATTATTTAC      |
| oJT123         | Generate Q332E mutation in rhesus TRIM5 $\alpha$ (Rev primer, amplify full plasmid with oJT122)                  | GTAAATAATGTCCCTGGTGCCTcAT<br>ACATTATCTGTGGGTTCCGAG      |
| oJT120         | Generate A333E mutation in rhesus TRIM5 $\alpha$ (Fwd primer, amplify full plasmid with oJT121)                  | GAACCCACAGATAATGTATCAGGaA<br>CCAGGGACATTATTTACGTTTCC    |
| oJT121         | Generate A333E mutation in rhesus TRIM5 $\alpha$ (Rev primer, amplify full plasmid with oJT120)                  | GGAAACGTAAATAATGTCCCTGGTt<br>CCTGATACATTATCTGTGGGTTTC   |
| oCY063         | Generate A333W mutation in rhesus TRIM5 $\alpha$ (Fwd primer, amplify full plasmid with oCY064)                  | GAACCCACAGATAATGTATCAGtgGc<br>CAGGGACATTATTTACGTTTC     |
| oCY064         | Generate A333W mutation in rhesus TRIM5 $\alpha$ (Rev primer, amplify full plasmid with oCY063)                  | GAAACGTAAATAATGTCCCTGGCCA<br>CTGATACATTATCTGTGGGTTTC    |
| oJT124         | Generate P334M mutation in rhesus TRIM5 $\alpha$ (Fwd primer, amplify full plasmid with oJT125)                  | CCCACAGATAATGTATCAGGCaatg<br>GGGACATTATTTACGTTTCCGTC    |
| oJT125         | Generate P334M mutation in rhesus TRIM5 $\alpha$ (Rev primer, amplify full plasmid with oJT124)                  | GACGGAAACGTAAATAATGTCCCcat<br>TGCCTGATACATTATCTGTGGG    |
| oJT095         | Generate G335I mutation in rhesus TRIM5 $\alpha$ (Fwd primer, amplify full plasmid with oJT096)                  | ACAGATAATGTATCAGGCACCAatcA<br>CATTATTTACGTTTCCGTCACTC   |
| oJT096         | Generate G335I mutation in rhesus TRIM5 $\alpha$ (Rev primer, amplify full plasmid with oJT095)                  | GAGTGACGGAAACGTAAATAATGTg<br>atTGGTGCCTGATACATTATCTGT   |
| oJT097         | Generate T336Q mutation in rhesus TRIM5 $\alpha$ (Fwd primer, amplify full plasmid with oJT098)                  | GATAATGTATCAGGCACCAGGGcaa<br>TTATTTACGTTTCCGTCACTCAC    |
| oJT098         | Generate T336Q mutation in rhesus TRIM5 $\alpha$ (Rev primer, amplify full plasmid with oJT097)                  | GTGAGTGACGGAAACGTAAATAAttg<br>CCCTGGTGCCTGATACATTATC    |
| oJT099         | Generate L337N mutation in rhesus TRIM5 $\alpha$ (Fwd primer, amplify full plasmid with oJT100)                  | GTATCAGGCACCAGGGACAaacTTT<br>ACGTTTCCGTCACTCACG         |
| oJT100         | Generate L337N mutation in rhesus TRIM5 $\alpha$ (Rev primer, amplify full plasmid with oJT99)                   | CGTGAGTGACGGAAACGTAAAgTTG<br>TCCCTGGTGCCTGATAC          |

|        |                                                                                          |                                                              |
|--------|------------------------------------------------------------------------------------------|--------------------------------------------------------------|
| oJT103 | Generate F338K mutation in rhesus TRIM5α (Fwd primer, amplify full plasmid with oJT104)  | TCAGGCACCAGGGACATTaagACG<br>TTTCCGTCACCTCACG                 |
| oJT104 | Generate F338K mutation in rhesus TRIM5α (Rev primer, amplify full plasmid with oJT103)  | CGTGAGTGACGGAAACGTcctTAATG<br>TCCCTGGTGCCTGA                 |
| oJT126 | Generate F338Q mutation in rhesus TRIM5α (Fwd primer, amplify full plasmid with oJT127)  | TCAGGCACCAGGGACATTAcagACG<br>TTTCCGTCACCTCACGA               |
| oJT127 | Generate F338Q mutation in rhesus TRIM5α (Rev primer, amplify full plasmid with oJT126)  | TCGTGAGTGACGGAAACGTctgTAAT<br>GTCCCTGGTGCCTGA                |
| oJT105 | Generate T339F mutation in rhesus TRIM5α (Fwd primer, amplify full plasmid with oJT106)  | CAGGCACCAGGGACATTATTTtctTT<br>TCCGTCACCTCACGAATTTCA          |
| oJT106 | Generate T339F mutation in rhesus TRIM5α (Rev primer, amplify full plasmid with oJT105)  | TGAAATTCGTGAGTGACGGAAAgaa<br>AAATAATGTCCCTGGTGCCTG           |
| oJT128 | Generate T339Q mutation in rhesus TRIM5α (Fwd primer, amplify full plasmid with oJT129)  | CAGGCACCAGGGACATTATTTcaGT<br>TTCCGTCACCTCACGAATTTCA          |
| oJT129 | Generate T339Q mutation in rhesus TRIM5α (Rev primer, amplify full plasmid with oJT128)  | GAAATTCGTGAGTGACGGAAActgA<br>AATAATGTCCCTGGTGCCTG            |
| oJT130 | Generate F340D mutation in rhesus TRIM5α (Fwd primer, amplify full plasmid with oJT131)  | GCACCAGGGACATTATTTACGgaTC<br>CGTCACTCACGAATTTCAATTA          |
| oJT131 | Generate F340D mutation in rhesus TRIM5α (Rev primer, amplify full plasmid with oJT130)  | TAATTGAAATTCGTGAGTGACGGAtc<br>CGTAAATAATGTCCCTGGTGC          |
| oJT132 | Generate P341G mutation in rhesus TRIM5α (Fwd primer, amplify full plasmid with oJT133)  | CACCAGGGACATTATTTACGTTTgg<br>GTCACTCACGAATTTCAATTATTGT       |
| oJT133 | Generate P341G mutation in rhesus TRIM5α (Rev primer, amplify full plasmid with oJT132)  | ACAATAATTGAAATTCGTGAGTGAC<br>ccAAACGTAAATAATGTCCCTGGTG       |
| oJT107 | Generate P341I mutation in rhesus TRIM5α (Fwd primer, amplify full plasmid with oJT108)  | CACCAGGGACATTATTTACGTTTata<br>TCACTCACGAATTTCAATTATTGTAC     |
| oJT108 | Generate P341I mutation in rhesus TRIM5α (Rev primer, amplify full plasmid with oJT107)  | GTACAATAATTGAAATTCGTGAGTG<br>AtatAAACGTAAATAATGTCCCTGGT<br>G |
| oJT109 | Generate P341IK mutation in rhesus TRIM5α (Fwd primer, amplify full plasmid with oJT110) | CACCAGGGACATTATTTACGTTTaaa<br>TCACTCACGAATTTCAATTATTGTAC     |
| oJT110 | Generate P341IK mutation in rhesus TRIM5α (Rev primer, amplify full plasmid with oJT109) | GTACAATAATTGAAATTCGTGAGTG<br>AtttAAACGTAAATAATGTCCCTGGTG     |
| oJT134 | Generate S342G mutation in rhesus TRIM5α (Fwd primer, amplify full plasmid with oJT135)  | AGGGACATTATTTACGTTTCCGggA<br>CTCACGAATTTCAATTATTGTACTG       |

|                           |                                                                                            |                                                        |
|---------------------------|--------------------------------------------------------------------------------------------|--------------------------------------------------------|
| oJT135                    | Generate S342G mutation in rhesus TRIM5α (Rev primer, amplify full plasmid with oJT134)    | CAGTACAATAATTGAAATTCGTGAG<br>TccCGGAAACGTAAATAATGTCCCT |
| oJT101                    | Generate T344E mutation in rhesus TRIM5α (Fwd primer, amplify full plasmid with oJT102)    | CATTATTTACGTTTCCGTCACTCgag<br>AATTTCAATTATTGTACTGGCGTC |
| oJT102                    | Generate T344E mutation in rhesus TRIM5α (Rev primer, amplify full plasmid with oJT101)    | GACGCCAGTACAATAATTGAAATTct<br>cGAGTGACGGAAACGTAAATAATG |
| oJT111                    | Generate T344stop mutation in rhesus TRIM5α (Fwd primer, amplify full plasmid with oJT112) | CATTATTTACGTTTCCGTCACTCtag<br>AATTTCAATTATTGTACTGGCGTC |
| oJT112                    | Generate T344stop mutation in rhesus TRIM5α (Rev primer, amplify full plasmid with oJT111) | GACGCCAGTACAATAATTGAAATTct<br>aGAGTGACGGAAACGTAAATAATG |
| <b>Sequencing primers</b> |                                                                                            |                                                        |
| pQCXIP<br>-F              | Sequencing primer from pQCXIP backbone 5' of multiple cloning site (Fwd)                   | acaccgggaccgatccag                                     |
| HsT5-<br>midF             | Sequencing primer from midpoint of human TRIM5α (Fwd)                                      | GATCTGGAGCATCGGCTG                                     |
| HsT5-<br>midR             | Sequencing primer from midpoint of human TRIM5α (Rev)                                      | CAAGGTCACGTTCTCCGTC                                    |
| RhT5-<br>midF             | Sequencing primer from midpoint of rhesus TRIM5α (Fwd)                                     | CTCATCTCAGAACTGGAGCATC                                 |
| RhT5-<br>midR             | Sequencing primer from midpoint of rhesus TRIM5α (Rev)                                     | CTTCAAGGTCATGTTCTCAATCC                                |

1

## 2 **ACKNOWLEDGEMENTS**

3 We thank all members of the Malik and Emerman labs, especially Shirleen Soh and Molly  
4 OhAinle, for feedback and advice. We thank Tera Levin, Kevin Forsberg, Molly Ohainle, Tyler  
5 Starr, Russell Vance, Patrick Mitchell, Janet Young, Nicholas Chesarino, Pravrutha Raman,  
6 Phoebe Hsieh, Shirleen Soh, and Rick McLaughlin for comments on the manuscript. The Fred  
7 Hutchinson Genomics Core performed Illumina sequencing. Chimeric HIV-1 gag/pol vectors  
8 with SIV CA were a gift from Theodora Hatzioannou. HIV-1 and HIV-2 gag/pol vectors were a  
9 gift from Jeremy Luban. Work was supported by the Hanna H. Gray fellowship (J.L.T.), an  
10 EXROP award (A.S.), and an Investigator award (H.S.M.) from HHMI, in addition to grants from  
11 the Mathers Foundation and NIAID (HARC [HIV Accessory and Regulatory Complexes] center,  
12 P50 AI082250, PI Nevan Krogan, subaward to M.E., H.S.M.). The authors declare no competing  
13 interests.

## 1 AUTHOR CONTRIBUTIONS

2 J.L.T., M.E., and H.S.M. conceived the study, designed experiments, and wrote the manuscript.

3 J.L.T., C.Y., and A.S. performed and analyzed experiments. C.Y. edited the manuscript.

4

## 5 REFERENCES

- 6 Berthoux, L., Sebastian, S., Sokolskaja, E., & Luban, J. (2004). Lv1 Inhibition of Human  
7 Immunodeficiency Virus Type 1 Is Counteracted by Factors That Stimulate Synthesis or  
8 Nuclear Translocation of Viral cDNA. *Journal of Virology*, *78*(21), 11739–11750.  
9 <http://doi.org/10.1128/JVI.78.21.11739-11750.2004>
- 10 Biris, N., Yang, Y., Taylor, A. B., Tomashevski, A., Guo, M., Hart, P. J., et al. (2012). Structure  
11 of the rhesus monkey TRIM5α PRYSPRY domain, the HIV capsid recognition module.  
12 *Proceedings of the National Academy of Sciences of the United States of America*, *109*(33),  
13 13278–13283. <http://doi.org/10.1073/pnas.1203536109>
- 14 Bock, M., Bishop, K. N., Towers, G., & Stoye, J. P. (2000). Use of a transient assay for studying  
15 the genetic determinants of Fv1 restriction. *Journal of Virology*, *74*(16), 7422–7430.  
16 <http://doi.org/10.1128/jvi.74.16.7422-7430.2000>
- 17 Clarke, L., Fairley, S., Zheng-Bradley, X., Streeter, I., Perry, E., Lowy, E., et al. (2017). The  
18 international Genome sample resource (IGSR): A worldwide collection of genome variation  
19 incorporating the 1000 Genomes Project data. *Nucleic Acids Research*, *45*(D1), D854–  
20 D859. <http://doi.org/10.1093/nar/gkw829>
- 21 Colón-Thillet, R., Hsieh, E., Graf, L., McLaughlin, R. N., Young, J. M., Kochs, G., et al. (2019).  
22 Combinatorial mutagenesis of rapidly evolving residues yields super-restrictor antiviral  
23 proteins. *PLoS Biology*, *17*(10), e3000181–18. <http://doi.org/10.1371/journal.pbio.3000181>
- 24 Compton, A. A., & Emerman, M. (2013). Convergence and divergence in the evolution of the  
25 APOBEC3G-Vif interaction reveal ancient origins of simian immunodeficiency viruses. *PLoS*  
26 *Pathogens*, *9*(1), e1003135. <http://doi.org/10.1371/journal.ppat.1003135>
- 27 Daugherty, M. D., & Malik, H. S. (2012). Rules of Engagement: Molecular Insights from Host-  
28 Virus Arms Races. *Annual Review of Genetics*, *46*(1), 677–700.  
29 <http://doi.org/10.1146/annurev-genet-110711-155522>
- 30 Daugherty, P. S., Chen, G., Iverson, B. L., & Georgiou, G. (2000). Quantitative analysis of the  
31 effect of the mutation frequency on the affinity maturation of single chain Fv antibodies.  
32 *Proceedings of the National Academy of Sciences of the United States of America*, *97*(5),  
33 2029–2034. <http://doi.org/10.1073/pnas.030527597>
- 34 Draghi, J. A., Parsons, T. L., Wagner, G. P., & Plotkin, J. B. (2010). Mutational robustness can  
35 facilitate adaptation. *Nature*, 1–3. <http://doi.org/10.1038/nature08694>
- 36 Duggal, N. K., & Emerman, M. (2012). Evolutionary conflicts between viruses and restriction  
37 factors shape immunity. *Nature Reviews Immunology*, 1–9. <http://doi.org/10.1038/nri3295>
- 38 Fowler, D. M., Araya, C. L., Fleishman, S. J., Kellogg, E. H., Stephany, J. J., Baker, D., & Fields,  
39 S. (2010). High-resolution mapping of protein sequence-function relationships. *Nature*  
40 *Methods*, *7*(9), 741–746. <http://doi.org/10.1038/nmeth.1492>
- 41 Guo, H. H., Choe, J., & Loeb, L. A. (2004). Protein tolerance to random amino acid change.  
42 *Proceedings of the National Academy of Sciences of the United States of America*, *101*(25),  
43 9205–9210. <http://doi.org/10.1073/pnas.0403255101>
- 44 Hayden, E. J., Ferrada, E., & Wagner, A. (2011). Cryptic genetic variation promotes rapid  
45 evolutionary adaptation in an RNA enzyme. *Nature*, *474*(7349), 92–95.  
46 <http://doi.org/10.1038/nature10083>



- 1 Jimenez-Guardeño, J. M., Apolonia, L., Betancor, G., & Malim, M. H. (2019).
- 2 Immunoproteasome activation enables human TRIM5 $\alpha$  restriction of HIV-1. *Nature*
- 3 *Microbiology*, 1–11. <http://doi.org/10.1038/s41564-019-0402-0>
- 4 Kim, K., Dauphin, A., Komurlu, S., McCauley, S. M., Yurkovetskiy, L., Carbone, C., et al. (2019).
- 5 Cyclophilin A protects HIV-1 from restriction by human TRIM5 $\alpha$ . *Nature Microbiology*, 1–17.
- 6 <http://doi.org/10.1038/s41564-019-0592-5>
- 7 Kirmaier, A., Wu, F., Newman, R. M., Hall, L. R., Morgan, J. S., O'Connor, S., et al. (2010).
- 8 TRIM5 Suppresses Cross-Species Transmission of a Primate Immunodeficiency Virus and
- 9 Selects for Emergence of Resistant Variants in the New Species. *PLoS Biology*, 8(8),
- 10 e1000462–12. <http://doi.org/10.1371/journal.pbio.1000462>
- 11 Kratovac, Z., Virgen, C. A., Bibollet-Ruche, F., Hahn, B. H., Bieniasz, P. D., & Hatziioannou, T.
- 12 (2008). Primate lentivirus capsid sensitivity to TRIM5 proteins. *Journal of Virology*, 82(13),
- 13 6772–6777. <http://doi.org/10.1128/JVI.00410-08>
- 14 Lascano, J., Uchil, P. D., Mothes, W., & Luban, J. (2015). TRIM5 Retroviral Restriction Activity
- 15 Correlates with the Ability To Induce Innate Immune Signaling. *Journal of Virology*, 90(1),
- 16 308–316. <http://doi.org/10.1128/JVI.02496-15>
- 17 Li, Y., Li, X., Stremlau, M., Lee, M., & Sodroski, J. (2006). Removal of arginine 332 allows
- 18 human TRIM5 $\alpha$  to bind human immunodeficiency virus capsids and to restrict infection.
- 19 *Journal of Virology*, 80(14), 6738–6744. <http://doi.org/10.1128/JVI.00270-06>
- 20 Li, Y.-L., Chandrasekaran, V., Carter, S. D., Woodward, C. L., Christensen, D. E., Dryden, K. A.,
- 21 et al. (2016). Primate TRIM5 proteins form hexagonal nets on HIV-1 capsids. *eLife*, 5.
- 22 <http://doi.org/10.7554/eLife.16269>
- 23 Maillard, P. V., Reynard, S., Serhan, F., Turelli, P., & Trono, D. (2007). Interfering residues
- 24 narrow the spectrum of MLV restriction by human TRIM5 $\alpha$ . *PLoS Pathogens*, 3(12),
- 25 e200. <http://doi.org/10.1371/journal.ppat.0030200>
- 26 McCarthy, K. R., Kirmaier, A., Autissier, P., & Johnson, W. E. (2015). Evolutionary and
- 27 Functional Analysis of Old World Primate TRIM5 Reveals the Ancient Emergence of
- 28 Primate Lentiviruses and Convergent Evolution Targeting a Conserved Capsid Interface.
- 29 *PLoS Pathogens*, 11(8), e1005085. <http://doi.org/10.1371/journal.ppat.1005085>
- 30 McCauley, S. M., Kim, K., Nowosielska, A., Dauphin, A., Yurkovetskiy, L., Diehl, W. E., &
- 31 Luban, J. (2018). Intron-containing RNA from the HIV-1 provirus activates type I interferon
- 32 and inflammatory cytokines. *Nature Communications*, 1–10. [http://doi.org/10.1038/s41467-](http://doi.org/10.1038/s41467-018-07753-2)
- 33 [018-07753-2](http://doi.org/10.1038/s41467-018-07753-2)
- 34 McEwan, W. A., Schaller, T., Ylinen, L. M., Hosie, M. J., Towers, G. J., & Willett, B. J. (2009).
- 35 Truncation of TRIM5 in the Feliformia Explains the Absence of Retroviral Restriction in Cells
- 36 of the Domestic Cat. *Journal of Virology*, 83(16), 8270–8275.
- 37 <http://doi.org/10.1128/JVI.00670-09>
- 38 McLaughlin, R. N., Poelwijk, F. J., Raman, A., Gosal, W. S., & Ranganathan, R. (2012). The
- 39 spatial architecture of protein function and adaptation. *Nature*, 491(7422), 138–142.
- 40 <http://doi.org/10.1038/nature11500>
- 41 Mitchell, P. S., Patzina, C., Emerman, M., Haller, O., Malik, H. S., & Kochs, G. (2012).
- 42 Evolution-Guided Identification of Antiviral Specificity Determinants in the Broadly Acting
- 43 Interferon-Induced Innate Immunity Factor MxA. *Cell Host and Microbe*, 12(4), 598–604.
- 44 <http://doi.org/10.1016/j.chom.2012.09.005>
- 45 Newman, R. M., Hall, L., Connole, M., Chen, G.-L., Sato, S., Yuste, E., et al. (2006). Balancing
- 46 selection and the evolution of functional polymorphism in Old World monkey TRIM5 $\alpha$ .
- 47 *Proceedings of the National Academy of Sciences of the United States of America*, 103(50),
- 48 19134–19139. <http://doi.org/10.1073/pnas.0605838103>
- 49 OhAinle, M., Helms, L., Vermeire, J., Roesch, F., Humes, D., Basom, R., et al. (2018). A virus-

- 1 packageable CRISPR screen identifies host factors mediating interferon inhibition of HIV.  
2 *eLife*, 7, 783. <http://doi.org/10.7554/eLife.39823>
- 3 Ohkura, S., Yap, M. W., Sheldon, T., & Stoye, J. P. (2006). All three variable regions of the  
4 TRIM5alpha B30.2 domain can contribute to the specificity of retrovirus restriction. *Journal*  
5 *of Virology*, 80(17), 8554–8565. <http://doi.org/10.1128/JVI.00688-06>
- 6 Owens, C. M., Yang, P. C., Gottlinger, H., & Sodroski, J. (2003). Human and Simian  
7 Immunodeficiency Virus Capsid Proteins Are Major Viral Determinants of Early, Postentry  
8 Replication Blocks in Simian Cells. *Journal of Virology*, 77(1), 726–731.  
9 <http://doi.org/10.1128/JVI.77.1.726-731.2003>
- 10 Perron, M. J., Stremlau, M., & Sodroski, J. (2006). Two surface-exposed elements of the  
11 B30.2/SPRY domain as potency determinants of N-tropic murine leukemia virus restriction  
12 by human TRIM5alpha. *Journal of Virology*, 80(11), 5631–5636.  
13 <http://doi.org/10.1128/JVI.00219-06>
- 14 Pertel, T., Hausmann, S., Morger, D., Züger, S., Guerra, J., Lascano, J., et al. (2011). TRIM5 is  
15 an innate immune sensor for the retrovirus capsid lattice. *Nature*, 472(7343), 361–365.  
16 <http://doi.org/10.1038/nature09976>
- 17 Pham, Q. T., Bouchard, A., Grütter, M. G., & Berthouix, L. (2010). Generation of human  
18 TRIM5alpha mutants with high HIV-1 restriction activity. *Gene Therapy*, 17(7), 859–871.  
19 <http://doi.org/10.1038/gt.2010.40>
- 20 Pham, Q. T., Veillette, M., Brandariz-Nuñez, A., Pawlica, P., Thibert-Lefebvre, C., Chandonnet,  
21 N., et al. (2013). A novel aminoacid determinant of HIV-1 restriction in the TRIM5α variable  
22 1 region isolated in a random mutagenic screen. *Virus Research*, 173(2), 306–314.  
23 <http://doi.org/10.1016/j.virusres.2013.01.013>
- 24 Pizzato, M., McCauley, S. M., Neagu, M. R., Pertel, T., Firrito, C., Ziglio, S., et al. (2015). Lv4 Is  
25 a Capsid-Specific Antiviral Activity in Human Blood Cells That Restricts Viruses of the  
26 SIVMAC/SIVSM/HIV-2 Lineage Prior to Integration. *PLoS Pathogens*, 11(7), e1005050–29.  
27 <http://doi.org/10.1371/journal.ppat.1005050>
- 28 Sawyer, S. L., Emerman, M., & Malik, H. S. (2004). Ancient Adaptive Evolution of the Primate  
29 Antiviral DNA-Editing Enzyme APOBEC3G. *PLoS Biology*, 2(9), e275–8.  
30 <http://doi.org/10.1371/journal.pbio.0020275>
- 31 Sawyer, S. L., Wu, L. I., Emerman, M., & Malik, H. S. (2005). Positive selection of primate  
32 TRIM5alpha identifies a critical species-specific retroviral restriction domain. *Proceedings of*  
33 *the National Academy of Sciences of the United States of America*, 102(8), 2832–2837.  
34 <http://doi.org/10.1073/pnas.0409853102>
- 35 Sebastian, S., & Luban, J. (2005). TRIM5alpha selectively binds a restriction-sensitive retroviral  
36 capsid. *Retrovirology*, 2, 40. <http://doi.org/10.1186/1742-4690-2-40>
- 37 Selyutina, A., Persaud, M., Simons, L. M., Bulnes-Ramos, A., Buffone, C., Martinez-Lopez, A.,  
38 et al. (2020). Cyclophilin A Prevents HIV-1 Restriction in Lymphocytes by Blocking Human  
39 TRIM5α Binding to the Viral Core. *Cell Reports*, 30(11), 3766–3777.e6.  
40 <http://doi.org/10.1016/j.celrep.2020.02.100>
- 41 Sheng, Z., Schramm, C. A., Kong, R., NISC Comparative Sequencing Program, Mullikin, J. C.,  
42 Mascola, J. R., et al. (2017). Gene-Specific Substitution Profiles Describe the Types and  
43 Frequencies of Amino Acid Changes during Antibody Somatic Hypermutation. *Frontiers in*  
44 *Immunology*, 8, 537. <http://doi.org/10.3389/fimmu.2017.00537>
- 45 Smith, J. M. (1970). Natural selection and the concept of a protein space. *Nature*, 225(5232),  
46 563–564. <http://doi.org/10.1038/225563a0>
- 47 Starr, T. N., Picton, L. K., & Thornton, J. W. (2017). Alternative evolutionary histories in the  
48 sequence space of an ancient protein. *Nature*, 549(7672), 409–413.  
49 <http://doi.org/10.1038/nature23902>



- 1 Stiffler, M. A., Hekstra, D. R., & Ranganathan, R. (2015). Evolvability as a Function of Purifying  
2 Selection in TEM-1  $\beta$ -Lactamase. *Cell*, 160(5), 882–892.  
3 <http://doi.org/10.1016/j.cell.2015.01.035>
- 4 Stremlau, M., Owens, C. M., Perron, M. J., Kiessling, M., Autissier, P., & Sodroski, J. (2004).  
5 The cytoplasmic body component TRIM5 $\alpha$  restricts HIV-1 infection in Old World  
6 monkeys. *Nature*, 427(6977), 848–853. <http://doi.org/10.1038/nature02343>
- 7 Stremlau, M., Perron, M., Lee, M., Li, Y., Song, B., Javanbakht, H., et al. (2006). Specific  
8 recognition and accelerated uncoating of retroviral capsids by the TRIM5 $\alpha$  restriction  
9 factor. *Proceedings of the National Academy of Sciences of the United States of America*,  
10 103(14), 5514–5519. <http://doi.org/10.1073/pnas.0509996103>
- 11 Stremlau, M., Perron, M., Welikala, S., & Sodroski, J. (2005). Species-specific variation in the  
12 B30.2(SPRY) domain of TRIM5 $\alpha$  determines the potency of human immunodeficiency  
13 virus restriction. *Journal of Virology*, 79(5), 3139–3145.  
14 <http://doi.org/10.1128/JVI.79.5.3139-3145.2005>
- 15 Suckow, J., Markiewicz, P., Kleina, L. G., Miller, J., Kisters-Woike, B., & Müller-Hill, B. (1996).  
16 Genetic studies of the Lac repressor. XV: 4000 single amino acid substitutions and analysis  
17 of the resulting phenotypes on the basis of the protein structure. *Journal of Molecular*  
18 *Biology*, 261(4), 509–523. <http://doi.org/10.1006/jmbi.1996.0479>
- 19 Tareen, S. U., & Emerman, M. (2011). Human Trim5 $\alpha$  has additional activities that are  
20 uncoupled from retroviral capsid recognition. *Virology*, 409(1), 113–120.  
21 <http://doi.org/10.1016/j.virol.2010.09.018>
- 22 Van Valen, L. (1973). A new evolutionary law. *Evol. Theory*, (1), 1–30.
- 23 Veillette, M., Bichel, K., Pawlica, P., Freund, S. M. V., Plourde, M. B., Pham, Q. T., et al. (2013).  
24 The V86M mutation in HIV-1 capsid confers resistance to TRIM5 $\alpha$  by abrogation of  
25 cyclophilin A-dependent restriction and enhancement of viral nuclear import. *Retrovirology*,  
26 10(1), 1–14. <http://doi.org/10.1186/1742-4690-10-25>
- 27 Welm, B. E., Dijkgraaf, G. J. P., Bledau, A. S., Welm, A. L., & Werb, Z. (2008). Lentiviral  
28 Transduction of Mammary Stem Cells for Analysis of Gene Function during Development  
29 and Cancer. *Cell Stem Cell*, 2(1), 90–102. <http://doi.org/10.1016/j.stem.2007.10.002>
- 30 Wu, F., Kirmaier, A., Goeken, R., Ourmanov, I., Hall, L., Morgan, J. S., et al. (2013). TRIM5  
31 alpha drives SIVsmm evolution in rhesus macaques. *PLoS Pathogens*, 9(8), e1003577.  
32 <http://doi.org/10.1371/journal.ppat.1003577>
- 33 Yang, Z. (1997). PAML: a program package for phylogenetic analysis by maximum likelihood.  
34 *Computer Applications in the Biosciences : CABIOS*, 13(5), 555–556.  
35 <http://doi.org/10.1093/bioinformatics/13.5.555>
- 36 Yap, M. W., Nisole, S., & Stoye, J. P. (2005). A single amino acid change in the SPRY domain  
37 of human Trim5 $\alpha$  leads to HIV-1 restriction. *Current Biology : CB*, 15(1), 73–78.  
38 <http://doi.org/10.1016/j.cub.2004.12.042>
- 39
